# Supplementary material for: Main group metal lone-pair⋯π(arene) interactions: a new bonding mode for supramolecular associations
Source: Royal Society of Chemistry journal article supplement (doi:10.1039/c6ce01460g), 2016-01-01
Supplement: c6ce01460g1.pdf [file c6ce01460g1.pdf]

**ESI Table S(1). Images for all tin(II)···π(arene) structures.**

**1**      **HEBXOB01** 3.47 Å 4.5°

Bis(2,6-di-*t*-butylphenolato)-tin(II)

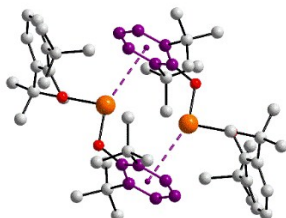

Notes: **0-D**. Mononuclear molecule. The Sn(II) interacts to form centrosymmetric dimer. T. J. Boyle, T. Q. Doan, L. A. M. Steele, C. Apblett, S. M. Hoppe, K. Hawthorne, R. M. Kalinich and W. M. Sigmund, *Dalton Trans.*, 2012, **41**, 9349.

**2**      **QIVNUE01** 3.62 Å 11.5°

Chloro-(*N,N'*-dimesitylpenta-2,4-diiminato)-tin(II)

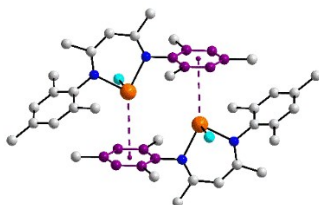

Notes: **0-D**. Mononuclear molecule. The Sn(II) interacts to form centrosymmetric dimer. S. L. Choong, W. D. Woodul, C. Schenk, A. Stasch, A. F. Richards and C. Jones, *Organometallics*, 2011, **30**, 5543.

**3**      **QOXQID** 3.76 Å 11.2°

Chloro-(*N,N'*-diphenyl-2,4-pentanediiiminato)-tin(II)

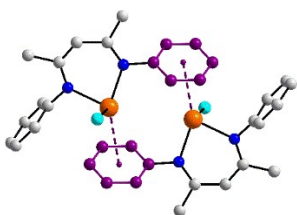

Notes: **0-D**. Mononuclear molecule. The Sn(II) interacts to form centrosymmetric dimer. A. Akkari, J. J. Byrne, I. Saur, G. Rima, H. Gornitzka and J. Barrau, *J. Organomet. Chem.*, 2001, **622**, 190.

**4**      **ZUNYAK** 3.80 Å 17.5°

Iodo-(*N,N'*-dimesitylpentane-2,4-di-iminato-*N,N'*)-tin(II)

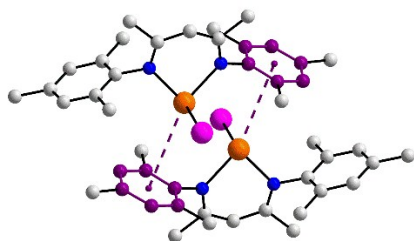

Notes: **0-D**. Mononuclear molecule. Two independent molecules. In one, the Sn(II) interacts to form centrosymmetric dimer. M. Ibarra-Rodriguez, V. M. Jimenez-Perez, B. M. Munoz-Flores, N. Waksman, R. Ramirez, M. Sanchez and I. F. Hernandez-Ahuactzi, *Arab. J. Chem.*, 2015, doi:10.1016/j.arabjc.2015.08.030

**5**      **OGAPES** 3.85 Å 8.0°

Chloro-[2-(2,6-di-isopropylphenylamino)-  
pent-2-en-4-onato-N,O]-tin(II)

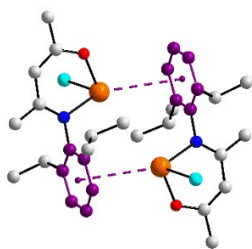

Notes: **0-D**. Mononuclear molecule. The Sn(II) interacts to form centrosymmetric dimer. H.-M. Kao, S.-M. Ho, I.-C. Chen, P.-C. Kuo, C.-Y. Lin, C.-Y. Tu, C.-H. Hu, J.-H. Huang and G.-H. Lee, *Inorg. Chim. Acta*, 2008, **361**, 2792.

**6**      **ZOBGEE** 3.86 Å 12.5°

Chloro-(N,N'-bis(2-methoxyphenyl)-pentane-  
2,4-di-iminato)-tin(II)

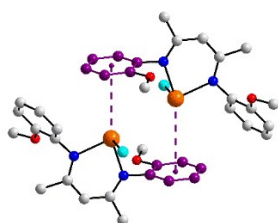

Notes: Notes: **0-D**. Mononuclear molecule. The Sn(II) interacts to form centrosymmetric dimer.

R. Olejnik, Z. Padelkova, R. Mundil, J. Merna and A. Ruzicka, *Appl. Organomet. Chem.*, 2014, **28**, 405.

**7**      **YOMVAY** 4.02 Å 19.6°

Iodo-(N,N'-bis(2,6-di-isopropylphenyl)-penta-  
2,4-diiminato)-tin(II)

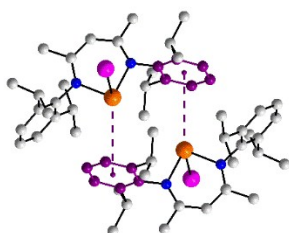

Notes: **0-D**. Mononuclear molecule. The Sn(II) interacts to form centrosymmetric dimer. A. Jana, H. W. Roesky, C. Schulzke, A. Doring, T. Beck, A. Pal and R. Herbst-Irmer, *Inorg. Chem.* 2009, **48**, 193.

**8**      **VAYTEW** 3.25 Å 7.6°

Bis( $\mu_2$ -2-t-Butylphenolato)-bis(2-t-  
butylphenolato)-di-tin(II)

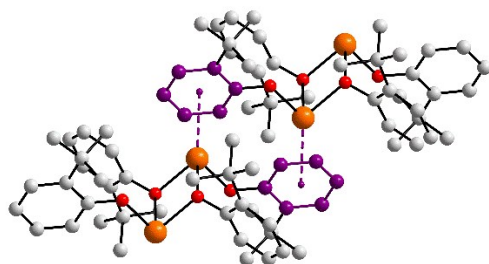

Notes: **0-D**. Two, centrosymmetric, binuclear molecules self-associate about a centre of inversion.

T. J. Boyle, T. Q. Doan, L. A. M. Steele, C. Apblett, S. M. Hoppe, K. Hawthorne, R. M. Kalinich and W. M. Sigmund, *Dalton Trans.* 2012, **41**, 9349.

**9 TOMWIC** 3.34 Å 7.1°

( $\mu_2$ -N<sup>2</sup>,N<sup>2'</sup>-(2,2-dimethylpropane-1,3-diylo)bis(N-[3-(dimethylamino)propyl]benzene-1,2-diamine))-di-tin(II)

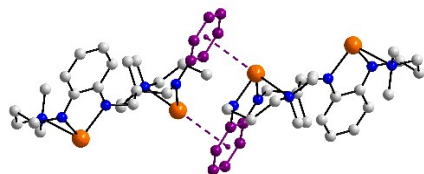

Notes: **0-D**. Binuclear molecule. One Sn(II) interacts to form centrosymmetric dimer.

F. E. Hahn, A. V. Zabula, T. Pape, A. Hepp, R. Tonner, R. Haunschild and G. Frenking, *Chem.-Eur. J.*, 2008, **14**, 10716.

**10 VAYTIA** 3.36 Å 10.8°; solvent: 3.59 Å 7.6°

bis( $\mu_2$ -2,6-Dimethylphenolato)-bis(2,6-dimethylphenolato)-di-tin(II) toluene solvate

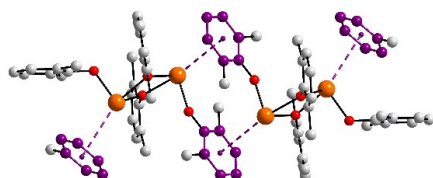

Notes: **0-D**. Two binuclear molecules self-associate about a centre of inversion. While

solvates are generally excluded, it is noted in this sample additional Sn(II)... $\pi$ (arene) contacts with solvent toluene molecules occur.

T. J. Boyle, T. Q. Doan, L. A. M. Steele, C. Apblett, S. M. Hoppe, K. Hawthorne, R. M. Kalinich and W. M. Sigmund, *Dalton Trans.* 2012, **41**, 9349.

**11 BUHTIJ** 3.37 Å 7.2°

[N-t-Butyl-N'-(1-t-butyl-2,3-dihydro-1H-1,3,2-benzodiazastannol-2-yl)benzene-1,2-diaminato](hydrido)tin tetrahydrofuran solvate

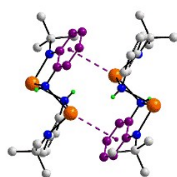

Notes: **0-D**. Binuclear molecule. One Sn(II) interacts to form centrosymmetric dimer.

S. Krupski, C. S. to Brinke, H. Koppetz, A. Hepp and F. E. Hahn, *Organometallics*, 2015, **34**, 2624.

**12 BEMMOX** 3.40 Å 4.0°

[ $\mu_2$ -N,N'-Bis(2,6-dimethylphenyl)oxamidato]-dichloro-bis(tetrahydrofuran)-di-tin(II)

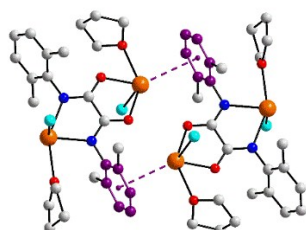

Notes: **0-D**. Binuclear molecule. One Sn(II) interacts to form centrosymmetric dimer.

M. Ibarra-Rodriguez, H. V. R. Dias, V. M. Jimenez-Perez, B. M. Munoz-Flores, A. Flores-Parra and S. Sanchez, *Z. Anorg. Allg. Chem.* 2012, **638**, 1486.

**13** VAYRUK 3.44 Å 8.9°

Bis( $\mu_2$ -dimethylamido)-bis(2-t-butylphenolato)-di-tin(II)

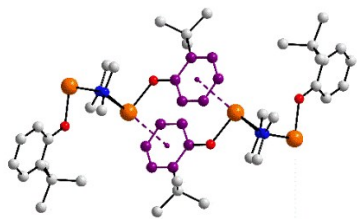

Notes: **0-D**. Two independent molecules, one centred about an inversion point. The molecule in the general position associates with a centrosymmetric molecule to form a dimer.

T. J. Boyle, T. Q. Doan, L. A. M. Steele, C. Apblett, S. M. Hoppe, K. Hawthorne, R. M. Kalinich and W. M. Sigmund, *Dalton Trans.* 2012, **41**, 9349.

**14** VAYSIZ 3.68 Å 5.7°

Bis( $\mu_2$ -dimethylamido)-bis(2,6-di-t-butylphenolato)-di-tin(II)

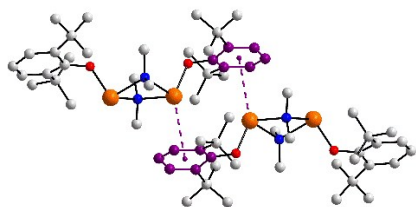

Notes: **0-D**. Binuclear molecule. One Sn(II) interacts to form centrosymmetric dimer.

T. J. Boyle, T. Q. Doan, L. A. M. Steele, C. Apblett, S. M. Hoppe, K. Hawthorne, R. M. Kalinich and W. M. Sigmund, *Dalton Trans.* 2012, **41**, 9349.

**15** VAYRIY 3.69 Å 8.2°

Bis( $\mu_2$ -dimethylamido)-bis(2-methylphenolato)-di-tin(II)

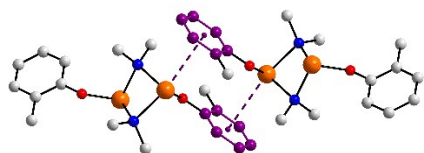

Notes: **0-D**. Binuclear molecule. One Sn(II) interacts to form centrosymmetric dimer.

T. J. Boyle, T. Q. Doan, L. A. M. Steele, C. Apblett, S. M. Hoppe, K. Hawthorne, R. M. Kalinich and W. M. Sigmund, *Dalton Trans.* 2012, **41**, 9349.

**16** LUCZIT 3.58 Å 11.3°

Bis( $\mu_3$ -Benzene-1,2-diolato)-bis[bis(trimethylsilyl)amido]-tri-tin(II)

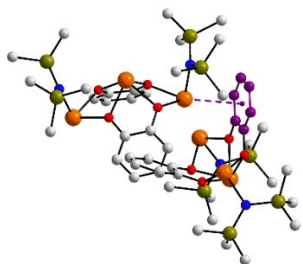

Notes: **0-D**. Two independent trinuclear molecules. One Sn(II) from one molecule interacts with an arene ring of another to give a dimer sustained by a single interaction.

A.V. Zabula, T. Pape, F. Hupka, A. Hepp and F. E. Hahn, *Organometallics*, **28**, 4221.

**17 VAYTAS** 3.26 Å 11.9°

Hexakis( $\mu_2$ -2-isopropylphenolato)-bis(2-isopropylphenolato)-tetra-tin(II)

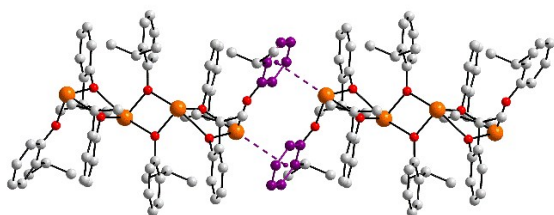

Notes: **0-D**. Two, centrosymmetric, tetranuclear molecules self-associate about a centre of inversion.

T. J. Boyle, T. Q. Doan, L. A. M. Steele, C. Apblett, S. M. Hoppe, K. Hawthorne, R. M. Kalinich and W. M. Sigmund, *Dalton Trans.* 2012, **41**, 9349.

**18 KOXCUX** 3.71 Å 11.6°

[2,6-Bis((4-methylphenyl)sulfonyl)phenyl]-chloro-tin(II) dichloromethane solvate

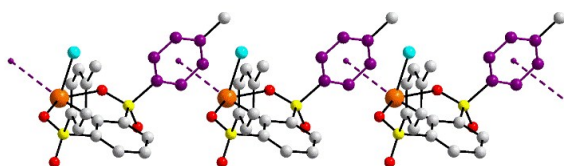

Notes: **1-D**. Mononuclear molecule. The Sn(II) interacts to form a linear chain.

M. El Ezzi, R. Lenk, D. Madec, J.-M. Sotiropoulos, S. Mallet-Ladeira and A. Castel, *Angew. Chem., Int. Ed.* 2015, **54**, 805.

**19 LIJMOI** 3.63 Å 13.3°

1,3-bis(2,6-Di-isopropylphenyl)-1,3-dihydro-1,3,2 $\lambda^2$ -benzodiazastannole

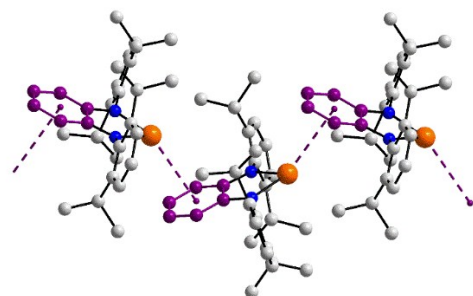

Notes: **1-D**. Mononuclear molecule. Mirror symmetry. The Sn(II) interacts to form a zigzag chain.

S. Krupski, R. Pöttgen, I. Schellenberg and F. E. Hahn, *Dalton Trans.* 2014, **43**, 173.

**20 ULOLOX** 3.44 Å 8.9°

(1,2-Bis(1-phenylethylamido)benzene)-tin(II)

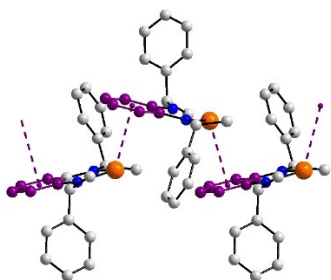

**1-D**. Mononuclear molecule. The Sn(II) interacts to form a helical chain.

J. V. Dickschat, S. Urban, T. Pape, F. Glorius and F. E. Hahn, *Dalton Trans.*, 2010, **39**, 11519.

**21 NIDTOL** 3.76 Å 2.8°

(N-Benzyl-N'-(pentafluorophenyl)-N-[2-((pentafluorophenyl)amino)ethyl]ethane-1,2-diaminato)-tin(II)

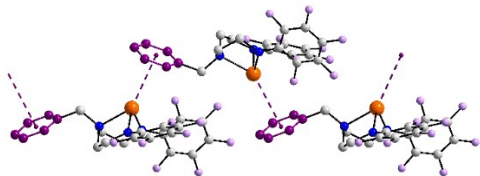

Notes: **1-D**. Mononuclear molecule. The Sn(II) interacts to form a helical chain.

M. Huang, M. M. Kireenko, E. Kh Lermontova, A. V. Churakov, Y. F. Oprunenko, K. V. Zaitsev, D. Sorokin, K. Harms, J. Sundermeyer, G. S. Zaitseva and S. S. Karlov, *Z. Anorg. Allg. Chem.*, 2013, **639**, 502.

**22 NUMWEX** 4.00 Å 16.6°

Dichloro-bis(triphenylphosphineoxide)-tin(II)

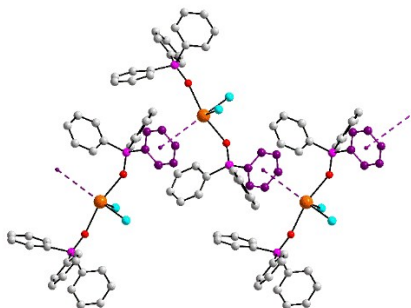

Notes: **1-D**. Mononuclear molecule. The Sn(II) interacts to form a helical chain.

R. Selvaraju, K. Panchanatheswaran and V. Parthasarathi, *Acta Crystallogr., Sect. C: Cryst. Struct. Commun.*, 1998, **54**, 905.

**23 BOKBOT** 3.38 Å 8.2°

Bis( $\mu_2$ -diisopropylanilido)-chloro-(isopropylanilido)-di-tin(II)

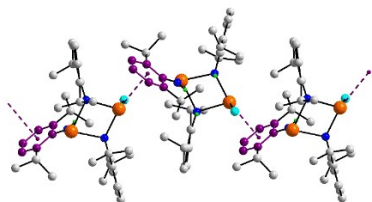

Notes: **1-D**. Binuclear molecule. One Sn(II) interacts to form a helical chain.

W. A. Merrill, J. Steiner, A. Betzer, I. Nowik, R. Herber and P. P. Power, *Dalton Trans.* 2008, 5905.

**ESI Table S(2). Images for all lead(lp)··· $\pi$ (arene) structures.**

**24 GISDET** 3.47 Å 4.3°

bis(3-(oxido)-1-(4-nitrophenyl)-3-phenyltriaz-1-ene)-lead(II)

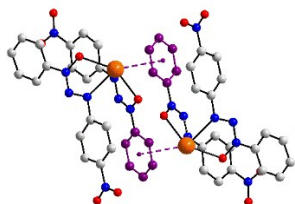

Notes: **0-D**. Centrosymmetric dimer between two mononuclear molecules.

B. A. Iglesias, D. F. Back, M. Horner, E. R. Crespan and F. Broch, *J. Organomet. Chem.*, 2014, **752**, 12.

**25 DABCUH** 3.49 Å 11.6°

Chloro-(N,N'-bis(2,6-dimethylphenyl)-2,4-pentanediiiminato)-lead(II) toluene solvate

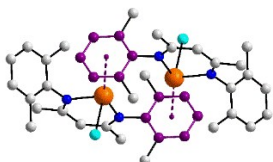

Notes: **0-D**. Centrosymmetric dimer between two mononuclear molecules. Dimer formation in the presence of a potential acceptor in lattice toluene.

E. C. Y. Tam, M. P. Coles, J. D. Smith and J. R. Fulton, *Polyhedron*, 2015, **85**, 284.

**26 HUGVUB** 3.89 Å 18.9°

(N,N'-bis(2,6-Diisopropylphenyl)pentane-2,4-diiminato-N,N')-methyl-lead(II)

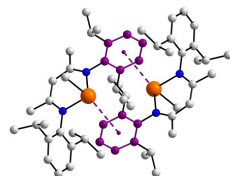

Notes: **0-D**. Centrosymmetric dimer between two mononuclear molecules.

A. Jana, S. P. Sarish, H. W. Roesky, C. Schulzke, A. Doring and M. John, *Organometallics*, 2009, **28**, 2563.

**27 DAYVOQ** 3.75 Å 3.6°

(1,3-bis(2,6-diisopropylphenyl)imidazol-2-ylidene)-dibromo-lead(II)

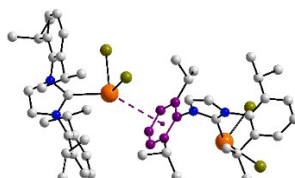

Notes: **0-D**. Dimer sustained by a single interaction between two independent mononuclear molecules.

C. Jones, A. Sidiropoulos, N. Holzmann, G. Frenking and A. Stasch, *Chem. Commun.*, 2012, **48**, 9855.



**28 DUZRIB** 3.75 Å 12.1°

(N<sup>2</sup>,N<sup>4</sup>-bis(2,6-dimethylphenyl)pentane-2,4-diiminato)-(t-butoxy)-lead(II)

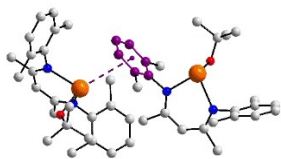

Notes: **0-D**. Dimer sustained by a single interaction between two independent mononuclear molecules.

E. C. Y. Tam, M. P. Coles, J. D. Smith and J. R. Fulton, *Polyhedron*, 2015, **85**, 284.

**29 HUGWEM** 3.91 Å 17.3°

(N,N'-bis(2,6-Diisopropylphenyl)pentane-2,4-diiminato-N,N')-phenylethynyl-lead(II)

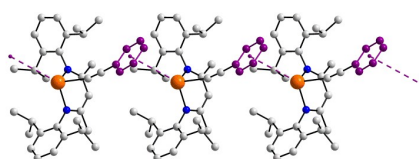

Notes: **1-D**. Mononuclear molecule that assembles into a linear chain.

A. Jana, S. P. Sarish, H. W. Roesky, C. Schulzke, A. Doring and M. John, *Organometallics*, 2009, **28**, 2563.

**30 KUQFAE01** 3.17 Å 8.3°

bis( $\mu_2$ -2-Methylquinolin-8-olato)-bis(isothiocyanato)-di-lead(II)

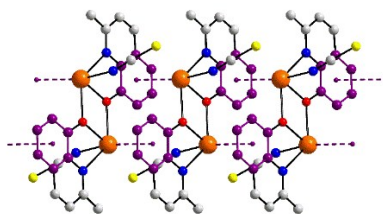

Notes: **1-D**. Centrosymmetric, binuclear molecule. Both lead(II) atoms form an interaction leading to a linear supramolecular chain.

G. Mohammadnezhad, M. M. Amini and V. Langer, *Acta Crystallogr., Sect. C: Cryst. Struct. Commun.*, 2010, **66**, m44.

**31 GOLMOK** 3.47 Å 12.8°

Bis( $\mu_2$ -5-Chloroquinolin-8-olato- $\kappa^3$ N,O;O; $\kappa^3$ O:N,O)-bis[(acetato- $\kappa^2$ O,O')]-lead(II)]

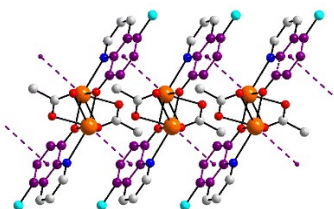

Notes: **1-D**. Centrosymmetric, binuclear molecule. Both lead(II) atoms form an interaction leading to a linear supramolecular chain.

G. Mohammadnezhad Sh., M. M. Amini and S. W. Ng, *Acta Crystallogr., Sect. E: Struct. Rep. Online*, 2009, **65**, m261.



**32** TUMFAJ 3.34 Å 8.3°; 3.40 Å 12.0°  
bis( $\mu_2$ -Benzil bis(benzoylhydrazonato))-di-  
lead(II)

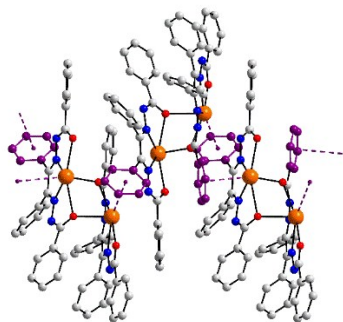

Notes: **1-D**. Non-symmetric, binuclear molecule. Both lead(II) atoms form an interaction leading to a helical supramolecular chain.

E. Lopez-Torres and M. A. Mendiola, *Dalton Trans.*, 2009, 7639.

**ESI Table S(3). Images for all thallium(Ip)··· $\pi$ (arene) structures.**

**33 MIBZIG** 3.06 Å 6.8°

( $\mu_2$ -2,6-Dimethylphenolato)-( $\mu_2$ -neopentoxo)-bis(neopentoxo)-(2,6-dimethylphenolato)-titanium-thallium

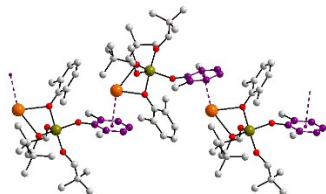

Notes: **1-D.** Mononuclear molecules are linked into a helical chain.

T. J. Boyle, C. A. Zechmann, T. M. Alam, M. A. Rodriguez, C. A. Hajar and B. L. Scott, *Inorg. Chem.*, 2002, **41**, 946.

**34 DIPSAY** 3.35 Å 11.5°

(1,1',1''-Boranetriyltris(3-methyl-1,3-dihydro-2H-benzimidazole-2-thione))-thallium(I)

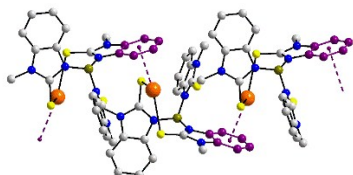

Notes: **1-D.** Mononuclear molecules are linked into a helical chain.

Y. Rong, J. H. Palmer and G. Parkin, *Dalton Trans.*, 2014, **43**, 1397.

**35 QUQZIN** 3.24 Å 2.6°

Benzyl(2-furylmethyl)carbamo-dithioate thallium(I)

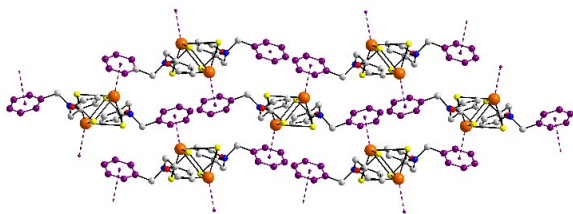

Notes: **2-D.** Centrosymmetric, binuclear molecules are linked into a layer with a flat topology.

G. Gomathi, S. Thirumaran and S. Ciattini, *Polyhedron*, 2015, **102**, 424.

ESI Table S(4). Images for all arsenic(Ip)···π(arene) structures.

36 FEFHOP 3.47 Å 9.2°

Diiodo-(4-carboxyphenyl)-arsenic(III)

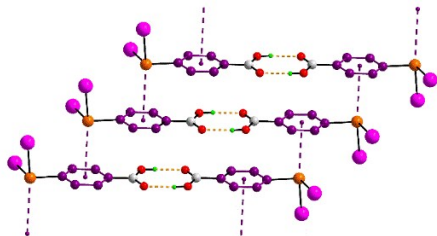

Notes: **1-D**. Mononuclear molecule. The As(III) interacts to form a linear chain. Chains

are connected by eight-membered carboxylic acid synthons  $\{\dots\text{HOC}=\text{O}\}_2$ .

I. Yu. Ilyin, N. A. Pushkarevsky, N. V. Kuratieva, D. Yu. Naumov and S. N. Konchenko, *Acta Crystallogr., Sect. C: Cryst. Struct. Commun.* 2012, **68**, m323.

37 RUTXUA 3.48 Å 6.9°

5-Phenyl-1,3λ<sup>4</sup>δ<sup>2</sup>,2,4,5-dithiadiazarsole

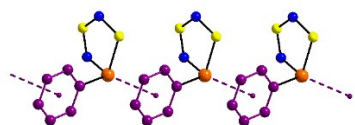

Notes: **1-D**. Mononuclear molecules are connected to form a linear chain.

V. Matuska, A. M. Z. Slawin and J. D. Woollins, *Inorg. Chem.*, 2010, **49**, 3064.

38 DIYCOF 3.36 Å 13.4°

[(5-Methyl-1,3,2-benzodithiarsole-2-yl)sulfanyl](bis(3-methylphenoxy))phosphine sulfide

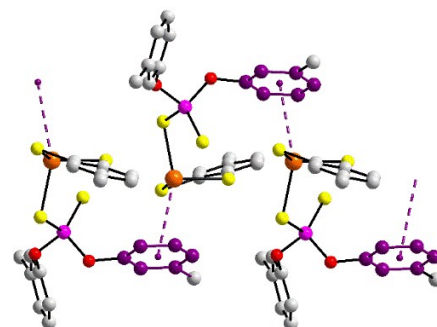

Notes: **1-D**. Mononuclear molecule. The As(III) interacts to form a helical chain.

S. Maheshwari, K. Bundela and K. G. Ojha, *J. Coord. Chem.* 2014, **67**, 1088.

**39** GETLUO 3.70 Å 12.5°

4-Iodo-4,5-dihydro-3H-dinaphtho[2,1-c:1',2'-e]arsine

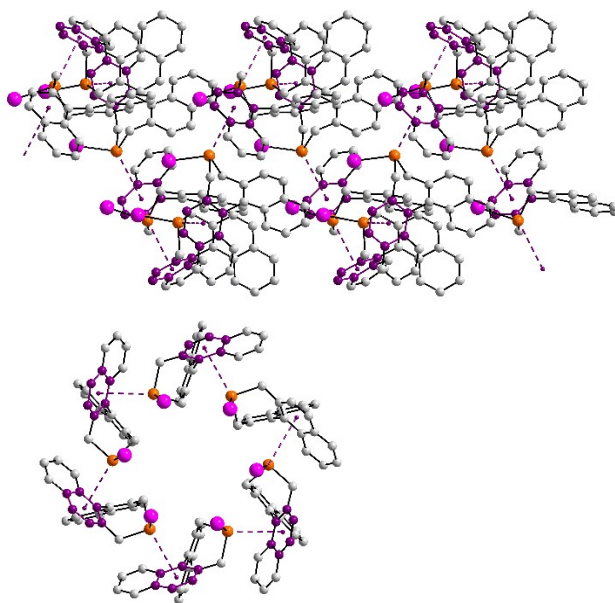

Notes: **1-D**. The molecules self-associate to form a tubular arrangement with crystallographic  $6_5$  symmetry.

N. L. Kilah and S. B. Wild, *Organometallics*, 2012, **31**, 2658.

**40** GETMAV 3.76 Å 12.7°

4-Chloro-4,5-dihydro-3H-dinaphtho[2,1-c:1',2'-e]arsine

Notes: **1-D**. The isostructural chloride analogue of GETLUO.

N. L. Kilah and S. B. Wild, *Organometallics*, 2012, **31**, 2658.

**41** LUFTOW 3.60 Å 9.9°

(2,5-Dimethoxy-1,4-phenylene)-bis(methylene)-diarsenodichloridothioite

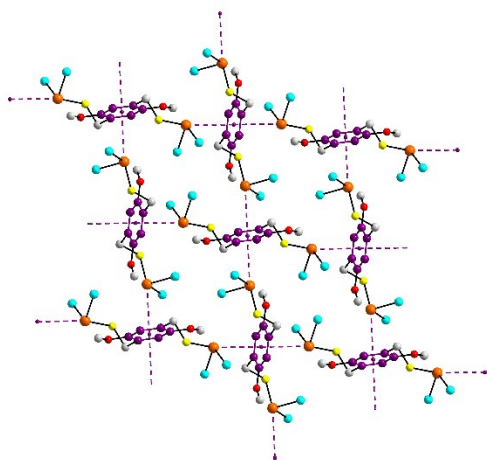

Notes: **2-D**. The binuclear molecule is centrosymmetric with the central phenyl ring participating in two interactions leading to a 2-D array with a flat topology.

V. M. Cangelosi, T. G. Carter, L. N. Zakharov and D. W. Johnson, *Chem. Commun.*, 2009, 5606.

ESI Table S(5). Images for all antimony(III)- $\pi$ (arene) structures.

42 WEWDOT 3.67 Å 10.6°

14-Chloro-7,14-dihydro-5H-benzo(c)naphtho(1,2-f)(1,5)oxastibocine

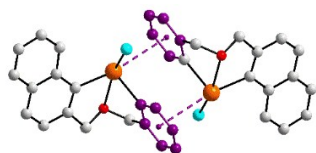

Notes: **0-D**. Mononuclear molecule. The Sb(III) interacts to form a centrosymmetric dimer.

N. Tan, Y. Chen, S.-F. Yin, R. Qiu, Y. Zhou and C. T. Au, *Dalton Trans.*, 2013, **42**, 9476.

43 YUGSOK 3.78 Å 17.3°

2,6-Bis(2,6-bis(Trifluoromethyl)phenyl)-4-(2,6-bis(dimethylaminomethyl)phenyl)-4-stibaboroxin

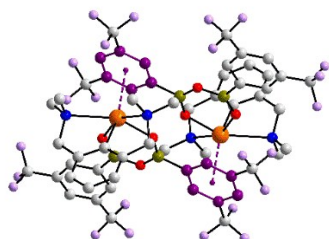

Notes: **0-D**. Mononuclear molecule. The Sb(III) interacts to form a centrosymmetric dimer.

L. Dostál, R. Jambor, A. Růžička, R. Jirásko, A. Lyčka, J. Beckmann and S. Ketkov, *Inorg. Chem.*, 2015, **54**, 6010.

44 TOMQAP 3.85 Å 15.1°

Chloro-(2,2'-((t-butylimino)dimethanediyl)diphenyl)-antimony(III)

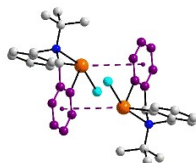

Notes: **0-D**. Mononuclear molecule. The Sb(III) interacts to form a centrosymmetric dimer.

Y. Chen, K. Yu, N.-Y. Tan, R.-H. Qiu, W. Liu, N.-L. Luo, L. Tong, C.-T. Au, Z.-Q. Luo and S.-F. Yin, *Eur. J. Med. Chem.*, 2014, **79**, 391.

45 MOZPAU 3.95 Å 14.3°

2,2-Dichloro-1,1-diphenyl-1,2,5,6-tetrahydro-1 $\lambda^5$ ,2 $\lambda^5$ -acenaphtho[5,6-cd][1,2]phosphastibole

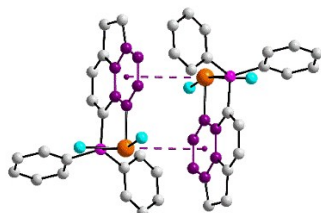

Notes: **0-D**. Mononuclear molecule. The Sb(III) interacts to form a centrosymmetric dimer.

E. Hupf, E. Lork, S. Mebs, L. Chęcińska and J. Beckmann, *Organometallics*, 2014, **33**, 7247.

**46**     **SEKGEW** 3.37 Å 0.2°

Dichloro-methyl-(1,10-phenanthroline-N,N')-antimony(III)

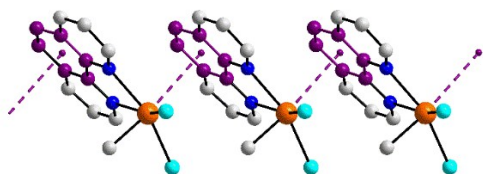

Notes: **1-D**. Mononuclear molecule with mirror symmetry. The Sb(III) interacts to form a linear chain.  $P2_1/m$  *cf.*  $Cm$  for SEKZIA.

S. L. Benjamin, W. Levason, G. Reid and R. P. Warr, *Organometallics*, 2012, **31**, 1025.

**47**     **SEKGIA** 3.38 Å 2.4°

Dibromo-methyl-(1,10-phenanthroline-N,N')-antimony(III)

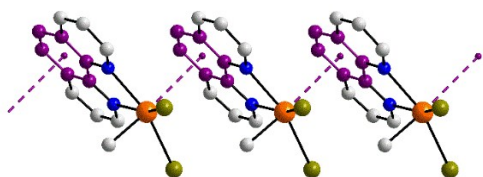

Notes: **1-D**. Mononuclear molecule with mirror symmetry. The Sb(III) interacts to form a linear chain.  $Cm$  *cf.*  $P2_1/m$  for SEKGEW.

S. L. Benjamin, W. Levason, G. Reid and R. P. Warr, *Organometallics*, 2012, **31**, 1025.

**48**     **HIJRID** 3.61 Å 5.4°

(N,N-Dimethyl-1-phenylmethanamine)-bis(isothiocyanate)-antimony(III)

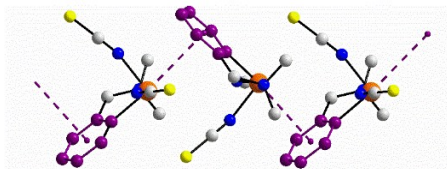

Notes: **1-D**. Mononuclear molecule. The Sb(III) interacts to form a helical chain. A. Toma, C. I. Rat, A. Silvestru, T. Ruffer, H. Lang and M. Mehring, *J. Organomet. Chem.*, 2013, **745**, 71.

**49**     **HORPIP** 3.94 Å 17.5°

(6-Sulfanyldibenzo[d,f][1,3,2]dioxaphosphepine 6-sulfido)-(2,2'-sulfanediyldibenzene-thiolato)-antimony(III)

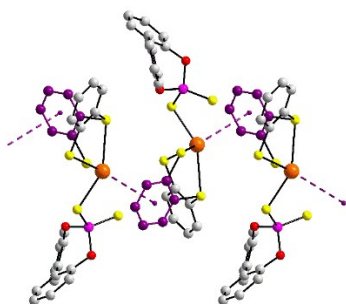

Notes: **1-D**. Mononuclear molecule. The Sb(III) interacts to form a helical chain. J. G. Alvarado-Rodriguez, S. Gonzalez-Montiel and N. Andrade-Lopez, *Main Group Met. Chem.*, 2013, **36**, 21.



**ESI Table S(6). Images for all bismuth(lp)··· $\pi$ (arene) structures.**

**50** BIQVAA 3.51 Å 4.5°

Bis(benzyl methyl ether)-chloro-bismuth(III)

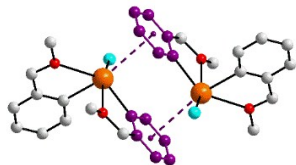

Notes: **0-D**. Mononuclear molecule.

Centrosymmetric molecules associate *via* Bi(lp)··· $\pi$ (arene) form a dimer.

N. Tan, Y. Chen, Y. Zhou, C.-T. Au, S.-F. Yin, *ChemPlusChem*, 2013, **78**, 1363.

**51** VICKAV 3.52 Å 3.7°

(2-[(Benzen-2-  
idylmethyl)sulfanyl]methyl)naphthalen-1-ide)-  
chloro-bismuth(III)

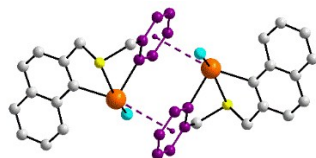

Notes: **0-D**. Mononuclear molecule.

Centrosymmetric molecules associate *via* Bi(lp)··· $\pi$ (arene) form a dimer.

N. Tan, Y. Chen, S.-F. Yin, R. Qiu, Y. Zhou and C. T. Au, *Dalton Trans.*, 2013, **42**, 9476.

**52** BIQGEP 3.55 Å 5.9°

Bis(benzyl methyl ether)-  
trifluoromethanesulfonate-bismuth(III)

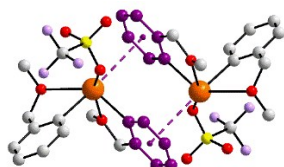

Notes: **0-D**. Mononuclear molecule.

Centrosymmetric molecules associate *via* Bi(lp)··· $\pi$ (arene) form a dimer.

N. Tan, Y. Chen, Y. Zhou, C.-T. Au, S.-F. Yin, *ChemPlusChem*, 2013, **78**, 1363.

**53** WOXFUM 3.59 Å 14.1°

Bis(4-Phenyl-1,3-thiazole-2-thiolato)-phenyl-  
bismuth(III)

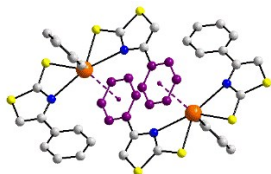

Notes: **0-D**. Centrosymmetric mononuclear molecules associate *via* Bi(lp)··· $\pi$ (arene) form a dimer between two bismuth centres.

A. Luqman, V. L. Blair, R. Brammananth, P. K. Crellin, R. L. Coppel, L. Kedzierski and P. C. Andrews, *Eur. J. Inorg. Chem.*, 2015, 725.

**54 WAZWOL** 3.67 Å 4.9°

( $\mu_2$ -Sulfido)-bis(2,2'-  
[(phenylimino)dimethanediyl]diphenyl)-di-  
bismuth(III)

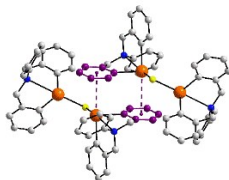

Notes: **0-D**. Binuclear molecule.

Centrosymmetric molecules associate *via*  
Bi(lp)... $\pi$ (arene) form a dimer between two  
bismuth centres.

R. Qiu, Z. Meng, S. Yin, X. Song, N. Tan, Y.  
Zhou, K. Yu, X. Xu, S. Luo, C.-T. Au and W.-  
Y. Wong, *ChemPlusChem*, 2012, **77**, 404.

**55 LONJUV** 3.71 Å 11.0°

5-(5,5-Dioxido-10H-  
dibenzo[b,e][1,4]thiabismine-10-yl)-4-(4-  
methylphenyl)-1-(2-phenylethyl)-1H-1,2,3-  
triazole

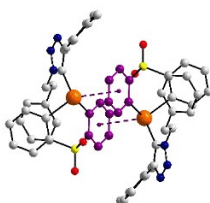

Notes: **0-D**. Mononuclear molecule.

Centrosymmetric molecules associate *via*  
Bi(lp)... $\pi$ (arene) form a dimer.

B. T. Worrell, S. P. Ellery and V. V. Fokin,  
*Angew. Chem., Int. Ed.*, 2013, **52**, 13037.

**56 MATQEF** 3.74 Å 13.7°

(2-((Dimethylamino)methyl)phenyl-C,N)-(2-  
((dimethylamino)methyl)phenyl)-(nitrate-O)-  
bismuth(III)

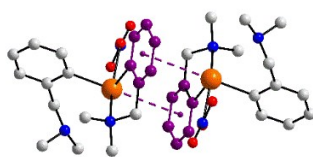

Notes: **0-D**. Mononuclear molecule.

Centrosymmetric molecules associate *via*  
Bi(lp)... $\pi$ (arene) form a dimer.

M. G. Nema, H. J. Breunig, A. Soran and C.  
Silvestru, *J. Organomet. Chem.*, 2012, **705**, 23.

**57 HIJROJ** 3.76 Å 13.1°

(N,N-Dimethyl-1-phenylmethanamine-C)-  
(N,N-dimethyl-1-phenylmethanamine-C,N)-  
isocyanate-bismuth(III)

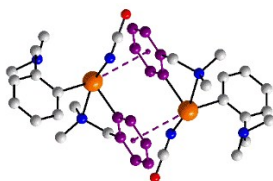

Notes: **0-D**. Mononuclear molecule.

Centrosymmetric molecules associate *via*  
Bi(lp)... $\pi$ (arene) form a dimer.

A. Toma, C. I. Rat, A. Silvestru, T. Ruffer, H.  
Lang, and M. Mehring, *J. Organomet. Chem.*,  
2013, **745**, 71.

**58** IZUHIV 3.76 Å 13.4°

(2-(Dimethylaminomethyl)phenyl-N,C)-(2-(dimethylaminomethyl)phenyl)-azido-bismuth(III)

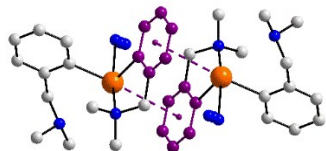

Notes: **0-D**. Mononuclear molecule.

Centrosymmetric molecules associate *via* Bi(lp)... $\pi$ (arene) form a dimer.

A.Schulz and A. Villinger, *Organometallics*, 2011, **30**, 284.

**59** WAZWUR 3.78 Å 3.9°

(2,2'-[(t-Butylimino)dimethanediyl]diphenyl)-methanethiolato-bismuth(III)

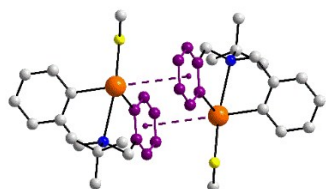

Notes: **0-D**. Centrosymmetric mononuclear molecules associate *via* Bi(lp)... $\pi$ (arene) form a dimer between two bismuth centres.

R. Qiu, Z. Meng, S. Yin, X. Song, N. Tan, Y. Zhou, K. Yu, X. Xu, S. Luo, C.-T. Au and W.-Y. Wong, *ChemPlusChem*, 2012, **77**, 404.

**60** NOCGES01 3.92 Å 18.2°

(2-(Dimethylaminomethyl)phenyl-N,C)-(2-(dimethylaminomethyl)phenyl)-iodo-bismuth(III)

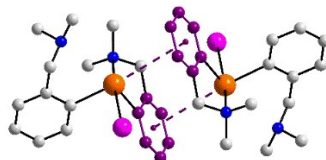

Notes: **0-D**. Mononuclear molecule.

Centrosymmetric molecules associate *via* Bi(lp)... $\pi$ (arene) form a dimer.

A.Schulz and A. Villinger, *Organometallics*, 2011, **30**, 284.

**61** DUGLIC 3.72 Å 13.2°

cis-Bis( $\mu$ -5-bromosalicylato)-bis(5-bromosalicylato)-diphenyl-dibismuth(III)

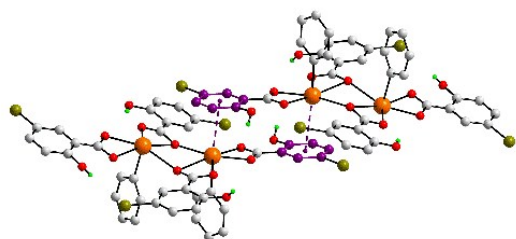

with a centrosymmetrically related molecule to form a dimer. While it is likely that two acidic H atoms have been misplaced, this does not mask hydrogen bonding between neighbouring units.

I.Kumar, P. Bhattacharya and K. H. Whitmire, *J. Organomet. Chem.*, 2015, **794**, 153.

Notes: **0-D**. One Bi(III) atom in the binuclear molecule forms a Bi(lp)... $\pi$ (arene) interaction

**62 BITRPH11** 3.79 Å 12.7°; 3.94 Å 13.0°

Triphenylbismuthine

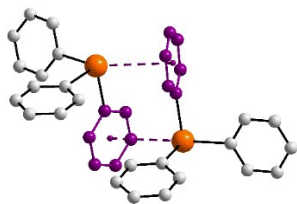

Notes: **0-D**. Two crystallographically independent mononuclear molecules associate *via* two Bi(lp)... $\pi$ (arene) interactions to form a dimer.

H.-G. Stammer and B. Neumann, Private Communication to the CSD (BITRPH11).

**63 HAQMAP** 3.37 Å 2.0°

Dibromo-methyl-(1,10-phenanthroline-N,N')-bismuth(III)

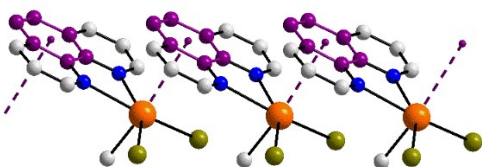

Notes: **1-D**. The Bi(III) atom in the mononuclear molecule lies on a mirror plane and connects to translationally related molecules to form a linear chain.

S. L. Benjamin, W. Levason, G. Reid, M. C. Rogers and R. P. Warr, *J. Organomet. Chem.*, 2012, **708**, 106.

**64 XAJHUO** 3.55 Å 13.0°; 3.59 Å 13.8°; 3.56 Å 12.4°; 3.61 Å 14.2° (lower image)

(2,2'-[Sulfanediy]bis(methylene)]di(phenyl))-bromo-bismuth(III)

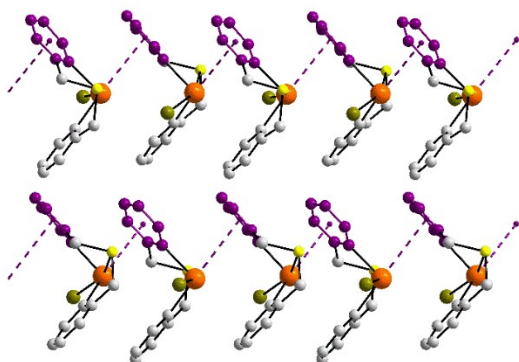

Notes: **1-D**. There are four independent mononuclear molecules in the asymmetric unit and each forms a Bi(lp)... $\pi$ (arene) interaction. Pairs self-associate to form a chain with a linear topology.

A. Toma, C. I. Rat, A. Silvestru, T. Ruffer, H. Lang and M. Mehring, *J. Organomet. Chem.*, 2016, **806**, 5.

**65 LEYZIA** 3.93 Å 15.2°

Chloro-(2-((naphthalen-1-yl-2-ylmethoxy)methyl)phenyl)-bismuth(III)

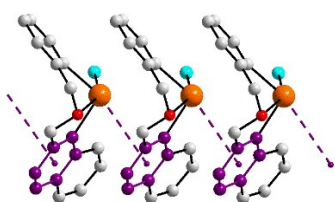

Notes: **1-D**. The Bi(III) atom in the mononuclear molecule connects to translationally related molecules to form a linear chain.

N. Tan, Y. Chen, S.-F. Yin, R. Qiu, Y. Zhou and C. T. Au, *Dalton Trans.*, 2013, **42**, 9476.

**66 ETUXIB** 3.85 Å 12.3°

6-Phenyl-6,7-dihydrodibenzo[c,f][1,5]azabismocin-12(5H)-yl perchlorate

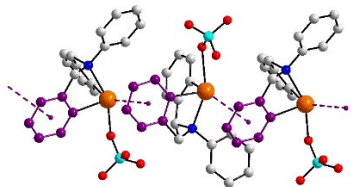

Notes: **0-D**. The Bi(III) atom in the mononuclear molecule forms a Bi(lp)... $\pi$ (arene) interaction with a molecule related by glide symmetry to generate a zigzag chain.

X.-W. Zhang and T. Fan, *Acta Crystallogr., Sect. E: Struct. Rep. Online*, 2011, **67**, m875.

**67 KIKRED** 3.42 Å 9.8°; 3.71 Å 13.0° (lower view)

2-Methyl-1,3-bis(trimethylsilyl)-2,3-dihydro-1H-naphtho[1,8-de][1,3,2]diazabismine

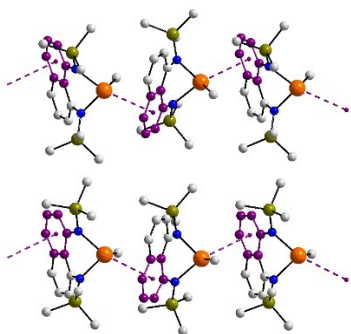

Notes: **1-D**. Two independent, mononuclear molecules, and each self-associates to form a chain with a helical topology.

B. Nekoueishahraki, P. P. Samuel, H. W. Roesky, D. Stern, J. Matussek, D. Stalke, *Cryst. Growth Des.*, 2012, **31**, 6697.

**68 PAFQIY** 3.73 Å 2.8°

Diphenyl(phenylsulfanyl)bismuthine

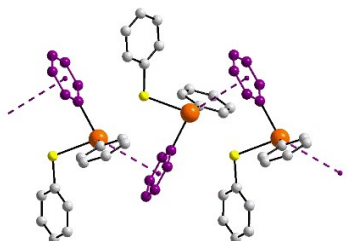

Notes: **1-D**. Mononuclear molecules self-associate to form a chain with a helical topology.

G. G. Briand, A. Decken, N. M. Hunter, G. M. Lee, J. A. Melanson and E. M. Owen, *Polyhedron*, 2012, **31**, 796.

**69 MSTLBI02** 3.93 Å 15.1°

Trimesityl-bismuth(III)

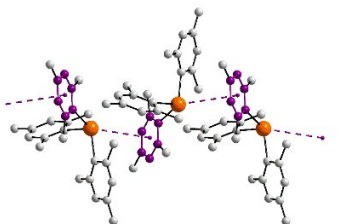

Notes: **1-D**. Mononuclear molecules self-associate to form a chain with a helical topology.

M. L. N. Rao and R. J. Dhanorkar, *RSC Advances*, 2016, **6**, 1012.

70      **DUGKOH** 3.28 Å 1.8°; 3.40 Å 2.1°

( $\mu$ -2-hydroxy-3-methoxybenzoato)-tris(2-hydroxy-3-methoxybenzoato)-diphenyl-(propan-2-ol)-di-bismuth(III)

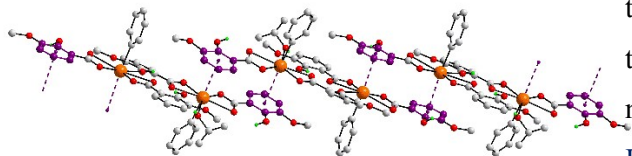

Notes: **1-D**. Each Bi(III) atom in the binuclear molecule forms Bi(lp)... $\pi$ (arene) interactions leading to a stepped chain. While it is likely that two acidic H atoms have been misplaced, this does not mask hydrogen bonding between neighbouring units.

I.Kumar, P. Bhattacharya and K. H. Whitmire, *J. Organomet. Chem.*, 2015, **794**, 153.

71      **DUGKIB** 3.27 Å 4.9°; 3.36 Å 3.7°

( $\mu$ -2-Hydroxy-3-methoxybenzoato)-tris(2-hydroxy-3-methoxybenzoato)-diphenyl-ethanol-di-bismuth(III)

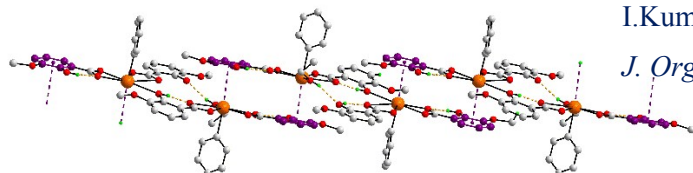

Notes: **1-D**. Each Bi(III) atom in the binuclear molecule forms Bi(lp)... $\pi$ (arene) interactions leading to a stepped chain.

I.Kumar, P. Bhattacharya and K. H. Whitmire, *J. Organomet. Chem.*, 2015, **794**, 153.



**ESI Table S(7). Images for all selenium(II)··· $\pi$ (arene) structures.**

**72**    **NARWUA** 3.47 Å 5.0°

Ethyl 3-(pyridin-2-ylsulfanyl)-1-benzoselenophene-2-carboxylate

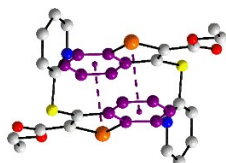

Notes: **0-D**. Mononuclear, centrosymmetrically related molecules associate *via* Se(lp)··· $\pi$ (arene) to form a dimer. P. Arsenyan, E. Paegle, S. Belyakov, I. Shestakova, E. Jaschenko, I. Domracheva and J. Popelis, *Eur. J. Med. Chem.*, 2011, **46**, 3434.

**73**    **ERUWIY** 3.49 Å 8.6°

Chloro-(2-(phenylazo)phenyl)-selenium

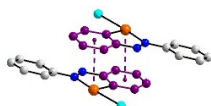

Notes: **0-D**. Two independent mononuclear molecules. For one of these, centrosymmetric

molecules associate *via* Se(lp)··· $\pi$ (arene) to form a dimer. K. Srivastava, T. Chakraborty, H. B. Singh and R. J. Butcher, *Dalton Trans.*, 2011, **40**, 4489.

**74**    **WARJIK** 3.49 Å 12.2°

6-Bromo-1,2-dihydroacenaphthylen-5-yl phenyl selenide

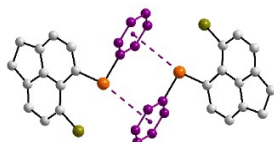

Notes: **0-D**. Mononuclear molecule. Self-associates about a centre of inversion to form a dimeric aggregate. L. K. Aschenbach, F. R. Knight, R. A. M. Randall, D. B. Cordes, A. Baggott, M. Buhl, A. M. Z. Slawin and J. D. Woollins, *Dalton Trans.*, 2012, **41**, 3141.

**75**    **OXAWOA** 3.51 Å 10.3°

2-Phenyl-3-(phenylselenanyl)-4H-chromen-4-one

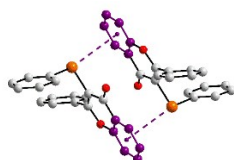

Notes: **0-D**. Mononuclear. Centrosymmetric molecules associate *via* Se(lp)··· $\pi$ (arene) to form a dimer. B. Godoi, A. Sperança, C. A. Bruning, D. F. Back, P. H. Menezes, C. W. Nogueira and G. Zeni, *Adv. Synth. Catal.*, 2011, **353**, 2042.

**76 QOMTIX** 3.57 Å 14.2°

5,5-bis(Methoxymethyl)-1,3-diphenyl-5,6-dihydro-4H-cyclopenta[c]selenophene

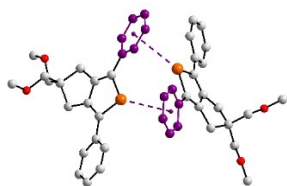

Notes: **0-D**. Mononuclear. Molecules related about a two-fold axis associate *via* Se(lp)...π(arene) to form a dimer.

A. Bedi, S. Debnath, H. S. Chandak and S. S. Zade, *RSC Advances*, 2014, **4**, 35653.

**77 WUSJUR** 3.57 Å 16.4°

4,7-Bis(1-naphthyl)-1,3-dihydro-2,1,3-benzoselenadiazole

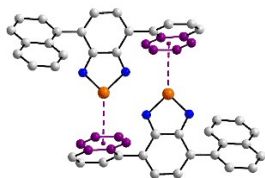

Notes: **0-D**. Mononuclear molecule. Self-associates about a centre of inversion to form a dimeric aggregate.

S. Mondal, M. Konda, B. Kauffmann, M. K. Manna and A. K. Das, *Cryst. Growth Des.*, 2015, **15**, 5548.

**78 SAGTOM** 3.58 Å 11.2°

(4-Iodo-5-phenylselenophen-2-yl)(3,4,5-trimethoxyphenyl)methanone

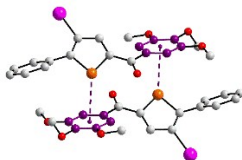

Notes: **0-D**. Mononuclear molecule. Self-associates about a centre of inversion to form a dimeric aggregate.

J. A. Roehrs, R. P. Pistoia, D. F. Back and G. Zeni, *J. Org. Chem.*, 2015, **80**, 12470.

**79 SADVOK** 3.66 Å 11.2°

2-(2-Furyl)-5-(4-methylphenyl)-1,3,4-selenadiazole

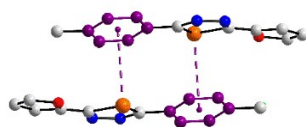

Notes: **0-D**. Two independent mononuclear molecules. One self-associates about a centre of inversion to form a dimeric aggregate.

D. B. Cordes, G. Hua, A. M. Z. Slawin and J. D. Woollins, *Acta Crystallogr., Sect. C: Cryst. Struct. Commun.*, 2011, **67**, o509.

**80** EVAVED 3.67 Å 8.2°

3-(4-Methylphenyl)-1-phenyl-3-(4,5,6,7-tetrahydro-1,2,3-benzoselenadiazol-4-yl)propan-1-one

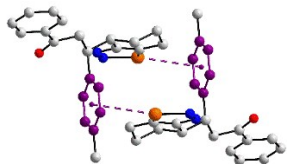

Notes: **0-D**. Mononuclear. Centrosymmetric molecules associate *via* Se(lp)... $\pi$ (arene) to form a dimer.

J. Muthukumaran, M. Nishandhini, S. Chitra, P. Manisankar, S. Bhattacharya, S. Muthusubramanian, R. Krishna and J. Jeyakanthan, *Acta Crystallogr., Sect. E: Struct. Rep. Online*, 2011, **67**, o1660.

**81** ISUJAI 3.69 Å 19.0°

7-Nitro-3H-2,1-benzoxaselenole

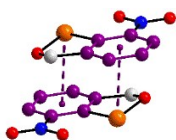

Notes: **0-D**. Mononuclear.

Centrosymmetrically related molecules associate *via* Se(lp)... $\pi$ (arene) to form a dimer. V. P. Singh, H. B. Singh and R. J. Butcher, *Chem. Asian J.*, 2011, **6**, 1431.

**82** AXAGOW 3.70 Å 12.3°

1-(2-Naphthyl)-3-phenyl-3-(4,5,6,7-tetrahydro-1,2,3-benzoselenadiazol-4-yl)propan-1-one

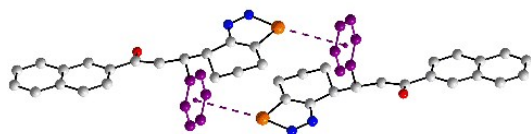

Notes: **0-D**. Mononuclear molecule.

Centrosymmetric molecules associate *via* Se(lp)... $\pi$ (arene) form a dimer. J. Muthukumaran, M. Nachiappan, S. Chitra, P. Manisankar, S. Bhattacharya, S. Muthusubramanian, R. Krishna and J. Jeyakanthan, *Acta Crystallogr., Sect. E: Struct. Rep. Online*, 2011, **67**, o2010.

**83** MIVYUN 3.86 Å 13.3°

5-((4-Methoxyphenyl)tellanyl)-6-(phenylselenanyl)-1,2-dihydroacenaphthylene

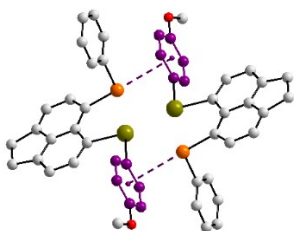

Notes: **0-D**. Mononuclear, centrosymmetrically related molecules associate *via* Se(lp)... $\pi$ (arene) to form a dimer. M. W. Stanford, F. R. Knight, K. S. A. Arachchige, P. S. Camacho, S. E. Ashbrook, M. Buhl, A. M. Z. Slawin and J. D. Woollins, *Dalton Trans.*, 2014, **43**, 6548.

**84 QOJWET** 3.87 Å 18.9°

Ethyl 2-(6-(bis(2-methoxy-2-oxoethyl)amino)-5-(2-methoxy-2-oxoethoxy)-1-benzofuran-2-yl)-1,3-selenazole-5-carboxylate

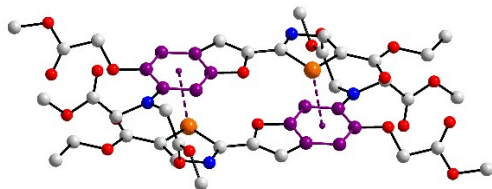

Notes: **0-D**. Mononuclear. Centrosymmetric molecules associate *via* Se(lp)... $\pi$ (arene) to form a dimer.

M. S. Afzal, J.-P. Pitteloud and D. Buccella, *Chem. Commun.*, 2014, **50**, 11358.

**85 QODXUE** 3.53 Å 16.7°

1-(Cyanoselanyl)-2-(2,6-diisopropylphenyl)-1H-1,2-benzoselenazole

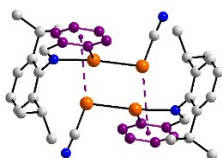

Notes: **0-D**. Mononuclear. Centrosymmetric molecules associate *via* Se(lp)... $\pi$ (arene) to form a dimer.

P. Rakesh, H. B. Singh, J. P. Jasinski and J. A. Golen, *Dalton Trans.*, 2014, **43**, 9431.

**86 ZOSSL** 3.84 Å 12.8°

3,8-Dimethoxynaphtho[1,8-cd][1,2]diselenole

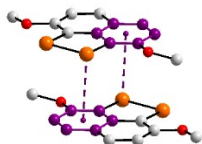

Notes: **0-D**. Mononuclear molecule. Self-associates about a centre of inversion to form a dimeric aggregate.

C. Figliola, L. Male, P. N. Horton, M. B. Pitak, S. J. Coles, S. L. Horswell and R. S. Grainger, *Organometallics*, 2014, **33**, 4449.

**87 FUXTOI** 3.91 Å 11.2°

Bis(2-(*t*-butylsulfonyl)-6-methoxyphenyl)diselane chloroform solvate

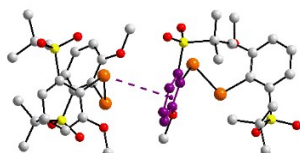

Notes: **0-D**. Two independent binuclear molecules in the asymmetric unit connected by a single interaction leading to a dimer.

D. M. Freudendahl, M. Iwaoka and T. Wirth, *Eur. J. Org. Chem.*, 2010, pp. 3934.

**88** RIHVEL 3.75 Å 18.3°; 3.92 Å 19.4°

5,6-Dihydroacenaphtho[5,6-cd][1,2]diselenole

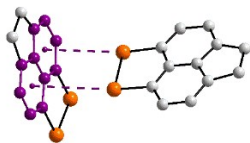

Notes: **0-D**. Two independent binuclear molecules. Both Se(II) atoms of one connect

with two rings of the other to form a dimeric aggregate.

C. G. M. Benson, C. M. Schofield, R. A. M. Randall, L. Wakefield, F. R. Knight, A. M. Z. Slawin and J. D. Woollins, *Eur. J. Inorg. Chem.*, 2013, pp. 427.

**89** CENBAA 3.36 Å 8.0°; 3.45 Å 4.7°

4,12,21,29-Tetra-*t*-butyl-35,36-diselena-8,25-diazanonacyclo-[30.2.1.1.15,18.02,7.06,10.09,14.019,24.023,27.026,31]hexatriaconta-1(34),2,4,6,9,11,13,15,17,19,21,23,26,28,30,32-hexadecaene

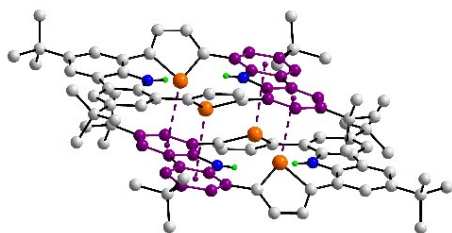

Notes: **0-D**. Binuclear molecule where both selenoether atoms associate *via* Se(lp)... $\pi$ (arene) to form a centrosymmetric dimer.

M. Masuda, C. Maeda and N. Yoshioka, *Org. Lett.*, 2013, **15**, 578.

**90** BEYCIT 3.71 Å 14.9°

7,13-Diphenyl-5,10,11,15-tetrahydro-9H-dibenzo[e,g][1,12,3,10,2,11]-dioxadiselenadiphosphacyclopentadecine 7,13-diselenide

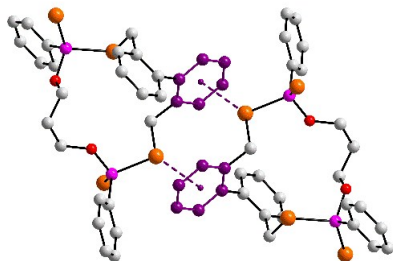

Notes: **0-D**. Tetranuclear molecule, two selenoether atoms and two selenides. Centrosymmetric molecules associate *via* Se(lp)... $\pi$ (arene) form a dimer, involving a selenoether atom.

G. Hua, A. M. Z. Slawin, R. A. M. Randall, D. B. Cordes, L. Crawford, M. Buhl and J. D. Woollins, *Chem. Commun.*, 2013, **49**, 2619.

**91 BEYCUF** 3.50 Å 9.0°

3,8-Diphenyl-1,5,6,10-tetrahydro-4,7,2,9,3,8-benzodioxadiselenadiphosphacyclododecine 3,8-diselenide

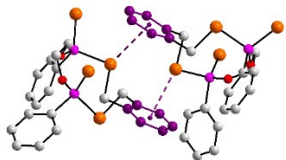

Notes: **0-D**. Tetranuclear molecule, two selenoether atoms and two selenides. Molecules related by two-fold symmetry associate *via* Se(lp)... $\pi$ (arene) to form a dimer, involving a selenoether atom.

G. Hua, A. M. Z. Slawin, R. A. M. Randall, D. B. Cordes, L. Crawford, M. Buhl and J. D. Woollins, *Chem. Commun.*, 2013, **49**, 2619.

**92 JOLZER** 3.48 Å 1.6°

2,3,5,6,8,9,11,12-Octamethoxytrisselenopheno-[2',3',4',5':12,13;2'',3'',4'',5'':4,5;2''',3''',4''',5''':8,9]tetraphenyleno[1,16-bcd]selenophene

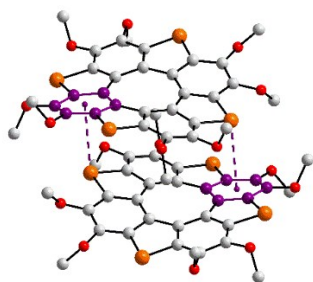

Notes: **0-D**. Tetranuclear molecules, each with two-fold symmetry, associate *via* Se(lp)... $\pi$ (arene) interactions between centrosymmetrically related molecules involving one Se(II) atom only to form a dimer.

X. Xiong, C.-L. Deng, B. F. Minaev, G. V. Baryshnikov, X.-S. Peng and H. N. C. Wong, *Chem. Asian J.*, 2015, **10**, 969.

**93 JANKIT** 3.59 Å 12.4°

2-Chloro-4,6-bis(bis(2-(phenylseleno)ethyl)amino)-1,3,5-triazine

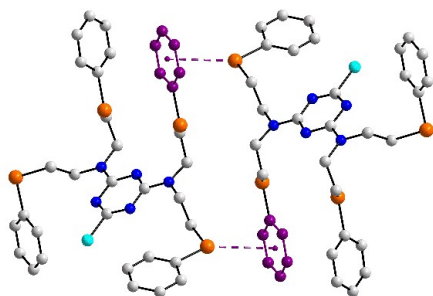

Notes: **0-D**. Tetranuclear molecules associate *via* Se(lp)... $\pi$ (arene) interactions between centrosymmetrically related molecules involving one Se(II) atom only to form a dimer.

M. D. Milton, N. Kumar, S. S. Sokhi, S. Singh, M. Maheshwari, J. D. Singh, M. Asnani and R. J. Butcher, *Tetrahedron Lett.*, 2004, **45**, 8941.



**94 WUSKAY** 3.43 Å 10.6°; 3.91 Å 16.8°  
4,7-Bis(4-methoxyphenyl)-1,3-dihydro-2,1,3-benzoselenadiazole

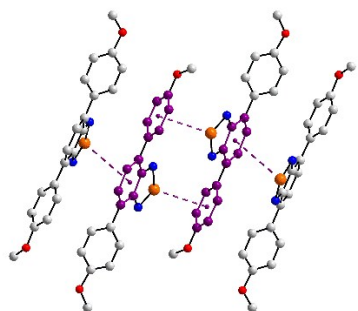

Notes: **0-D**. Two independent mononuclear molecules. One self-associates about a centre of inversion to form a dimeric aggregate which is connected to two of the other molecules to form a four molecular aggregate.

S. Mondal, M. Konda, B. Kauffmann, M. K. Manna and A. K. Das, *Cryst. Growth Des.*, 2015, **15**, 5548.

**95 UJIVUF** 3.60 Å 12.8°  
5-(1λ<sup>3</sup>-Diiodan-1-yl)-5H-5λ<sup>4</sup>-dibenzo[b,d]selenophene

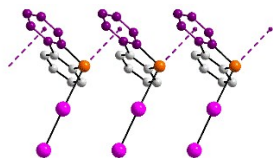

Notes: **1-D**. Mononuclear molecules associate via Se(II) to form a linear chain.

T. M. Klapotke, B. Krumm and M. Scherr, *Z. Anorg. Allg. Chem.*, 2010, **636**, 1955.

**96 ERUVUJ** 3.63 Å 8.5°  
Bromo-(2-(phenylazo)phenyl)-selenium

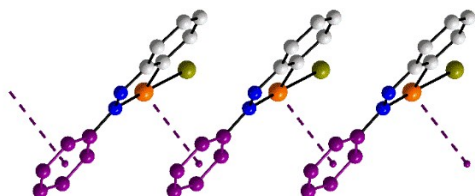

Notes: **1-D**. Mononuclear molecules self-associate to form a chain with a linear topology.

K. Srivastava, T. Chakraborty, H. B. Singh and R. J. Butcher, *Dalton Trans.*, 2011, **40**, 4489.

**97 TOVQEC** 3.64 Å 14.8°  
2-(Ethylsulfonyl)-1-(4-methylphenyl)-2-(phenylselenanyl)ethanone

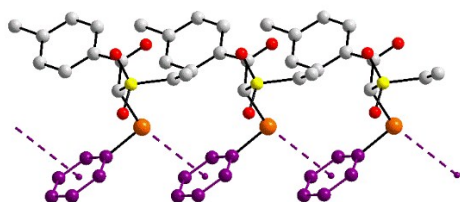

Notes: **1-D**. Mononuclear molecules associate via Se(II) to form a linear chain.

C. R. Cerqueira Jr, P. R. Olivato, D. N. S. Rodrigues, J. Zukerman-Schpector, E. R. T. Tiekink and M. D. Colle, *J. Mol. Struct.*, 2015, **1084**, 190.

**98**    **WARLAE** 3.78 Å 7.8°

5-(Phenylsulfanyl)-6-(phenylselanyl)-1,2-dihydroacenaphthylene

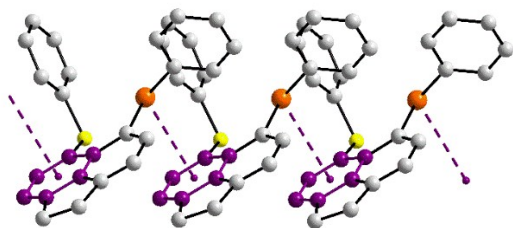

Notes: **1-D**. Mononuclear molecule. These associate *via* Se(II) interactions to form a linear chain.

L. K. Aschenbach, F. R. Knight, R. A. M. Randall, D. B. Cordes, A. Baggott, M. Buhl, A. M. Z. Slawin and J. D. Woollins, *Dalton Trans.*, 2012, **41**, 3141.

**99**    **ZOMMIZ** 3.83 Å 6.8°

Se-methyl biphenyl-4-carboselenoate

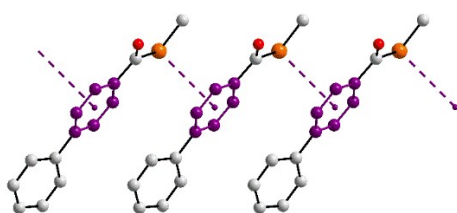

Notes: **1-D**. Mononuclear molecule. These associate *via* Se(II) interactions to form a linear chain.

T. Murai, D. Nishi, S. Hayashi and W. Nakanishi, *Bull. Chem. Soc. Jpn*, 2014, **87**, 677.

**100**    **OPUYII** 3.84 Å 15.4°

2-Benzyl-naphtho[2,3-d][1,2]selenazol-3(2H)-one

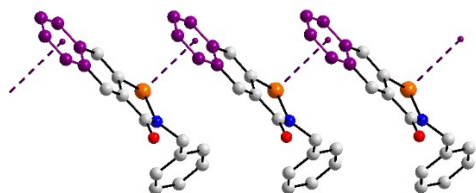

Notes: **1-D**. Mononuclear molecules associate *via* Se(II) to form a linear chain.

S. J. Balkrishna, B. S. Bhakuni, D. Chopra and S. Kumar, *Org.Lett.*, 2010, **12**, 5394.

**101**    **ZOMMOF** 3.85 Å 16.1°

Se-methyl biphenyl-4-carboselenothioate

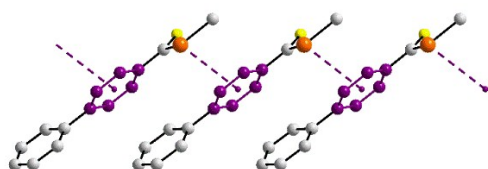

Notes: **1-D**. Mononuclear molecule. These associate *via* Se(II) interactions to form a linear chain.

T. Murai, D. Nishi, S. Hayashi and W. Nakanishi, *Bull. Chem. Soc. Jpn*, 2014, **87**, 677.

**102 SENGH01** 3.91 Å 12.6°

2-Phenyl-1,2-benzoselenazol-3(2H)-one

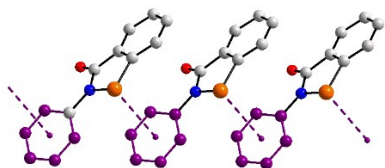

Notes: **1-D**. Mononuclear molecules associate *via* Se(II) to form a linear chain.

S. P. Thomas, K. Satheeshkumar, G. Mugesh and T. N. Guru Row, *Chem.-Eur. J.*, 2015, **21**, 6793.

**103 XEYZIM** 3.95 Å 9.9°

Se-(4'-cyanobiphenyl-4-yl) ethaneselenoate

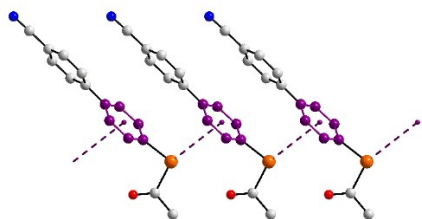

Notes: **1-D**. Mononuclear molecule. These associate *via* Se(II) interactions to form a linear chain.

K. Grenader, M. Kind, L. Silies, A. Peters, J. W. Bats, M. Bolte and A. Terfort, *J. Mol. Struct.*, 2013, **1039**, 61.

**104 ZUBWAW** 3.48 Å 4.5°

4-(4-Chlorophenyl)-2,3-diphenyl-1,3-selenazolidin-5-one

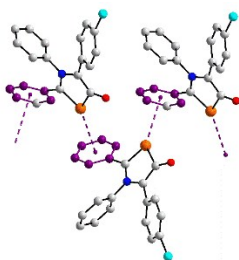

Notes: **1-D**. Mononuclear molecule. These associate *via* Se(II) interactions to form a zigzag chain.

G. Hua, J. Du, A. L. Fuller, K. S. A. Arachchige, D. B. Cordes, A. M. Z. Slawin, J. D. Woollins, *Synlett*, 2015, **26**, 839.

**105 QOVGAL** 3.58 Å 18.0°

1-(1-Benzoselenophen-2-yl)piperidine

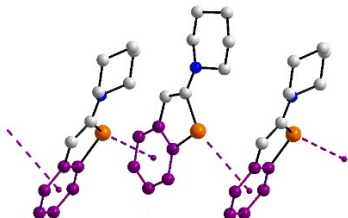

Notes: **1-D**. Mononuclear molecules associate *via* Se(II) to form a zigzag chain.

E. A. Popova, M. L. Petrov and A. G. Lyapunova, Private Communication to the CSD (QOVGAL).

**106** EDIGUU02 3.75 Å 4.2°

2-(3-Hydroxyphenyl)-1,2-benzoselenazol-3(2H)-one

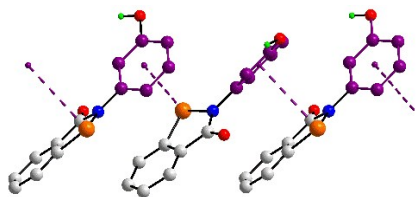

Notes: **1-D**. Mononuclear molecules self-associate to form a chain with a zigzag topology.

S. P. Thomas, K. Satheeshkumar, G. Mugesh and T. N. Guru Row, *Chem.-Eur. J.*, 2015, **21**, 6793.

**107** XAYCIL 3.91 Å 19.3°

16,19-Diphenyl-15-selenapentacyclo[6.6.5.0<sup>1,18</sup>.0<sup>2,7</sup>.0<sup>9,14</sup>]nonadeca-2,4,6,9,11,13,16,18-octaene

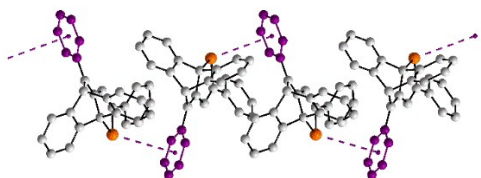

Notes: **1-D**. Mononuclear molecule. These associate *via* Se(II) interactions to form a zigzag chain.

A. Ishii, T. Annaka and N. Nakata, *Chem.-Eur. J.*, 2012, **18**, 6428.

**108** XAYCUX 3.97 Å 19.8°

16,19-Bis(4-fluorophenyl)-15-selenapentacyclo[6.6.5.0<sup>1,18</sup>.0<sup>2,7</sup>.0<sup>9,14</sup>]nonadeca-2,4,6,9,11,13,16,18-octaene

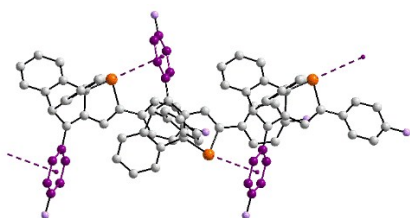

Notes: **1-D**. Mononuclear molecule. These associate *via* Se(II) interactions to form a zigzag chain.

A. Ishii, T. Annaka and N. Nakata, *Chem.-Eur. J.*, 2012, **18**, 6428.

**109** GIYJUV 3.98 Å 9.5°

8-(Dimethylamino)-1-naphthyl selenocyanate

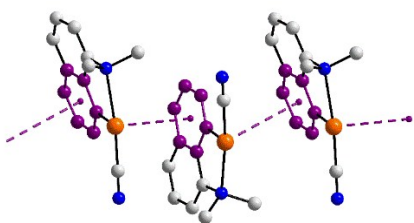

Notes: **1-D**. Mononuclear molecules self-associate to form a chain with a zigzag topology.

P. Rakesh, H. B. Singh and R. J. Butcher, *Organometallics*, 2013, **32**, 7275.

**110** DIZSIQ 3.48 Å 8.6°

4-(3,4-Dichlorophenyl)-2-(4-(pentafluoro-sulfanyl)phenyl)-1,3-selenazole

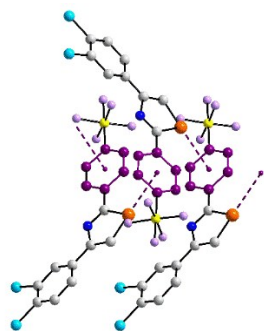

Notes: **1-D**. Mononuclear molecules self-associate to form a chain with a helical topology.

G. Hua, J. Du, A. M. Z. Slawin and J. D. Woollins, *J. Org. Chem.*, 2014, **79**, 3876.

**111** AFUPEY 3.51 Å 16.4°

Ethyl 3-(4-chlorophenyl)-2-phenyl-3-(4-phenyl-1,2,3-selenadiazol-5-yl)propanoate

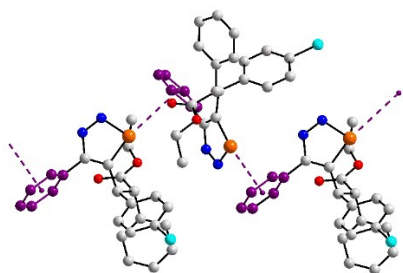

Notes: **1-D**. Mononuclear molecules self-associate to form a chain with a helical topology.

P. Sugumar, S. Sankari, P. Manisankar, V. Thiruselvam and M. N. Ponnuswamy, *Acta Crystallogr., Sect. E: Struct. Rep. Online*, 2013, **69**, o1239.

**112** GAQQEW 3.54 Å 17.3°

Ethyl 3-(4-methylphenyl)-2-phenyl-3-(4-phenyl-1,2,3-selenadiazol-5-yl)propanoate

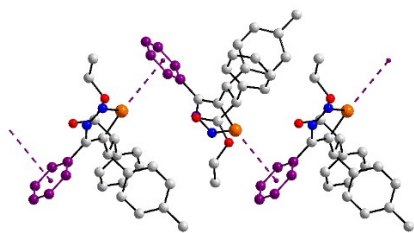

Notes: **1-D**. Mononuclear molecules self-associate to form a chain with a helical topology.

S. Sankari, P. Sugumar, T. Manisankar, S. Muthusubramanian and M. N. Ponnuswamy, *Acta Crystallogr., Sect. E: Struct. Rep. Online*, 2012, **68**, o447.

**113** LEDZIF 3.57 Å 11.8°

Ethyl 3-(4-methoxyphenyl)-2-phenyl-3-(4-phenyl-1,2,3-selenadiazol-5-yl)propanoate

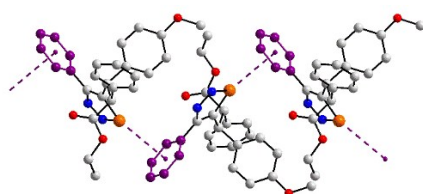

Notes: **1-D**. Mononuclear molecules self-associate to form a chain with a helical topology.

P. Sugumar, S. Sankari, P. Manisankar and M. N. Ponnuswamy, *Acta Crystallogr., Sect. E: Struct. Rep. Online*, 2012, **68**, o2347.

**114 ZOGFIM** 3.74 Å 17.2°

N,N,2,4-Tetraphenyl-1,3-selenazol-5-amine

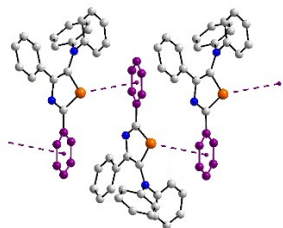

Notes: **1-D**. Mononuclear molecule. These associate *via* Se(II) interactions to form a helical chain.

T. Murai, K. Yamaguchi, F. Hori and T. Maruyama, *J. Org. Chem.*, 2014, **79**, 4930.

**115 WEKWOA** 3.53 Å 15.3°

1,2-Bis(4-fluorophenyl)-1-(diiodo)diselane  
diselane

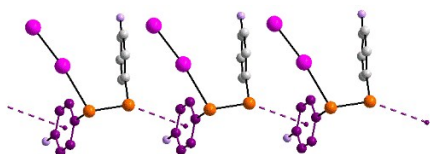

Notes: **1-D**. Binuclear molecule. One of the Se(II) atoms form Se(II) interactions to form a linear chain.

N. A. Barnes, S. M. Godfrey, J. Hughes, R. Z. Khan, I. Mushtaq, R. T. A. Ollerenshaw, R. G. Pritchard and S. Sarwar, *Dalton Trans.*, 2013, **42**, 2735.

**116 HGOBOW** 3.69 Å 8.4°

2,5-Diethyl-7,8-diselenabicyclo[4.2.0]octa-  
1,3,5-triene-3,4-dicarbonitrile

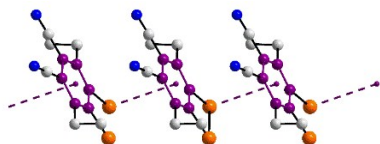

Notes: **1-D**. Binuclear molecules self-associate *via* one Se(II) atom only to form a chain with a linear topology.

T. Kimura, T. Nakahodo, H. Fujihara and E. Suzuki, *Inorg. Chem.*, 2014, **53**, 4411.

**117 COFBAC** 3.87 Å 9.4°

6-(Morpholin-4-yl)-2-phenyl-4H-4λ<sup>4</sup>,5 λ<sup>4</sup>-  
[1,2,4]diselenazolo[1,5-b][1,2,4]oxaselenazole

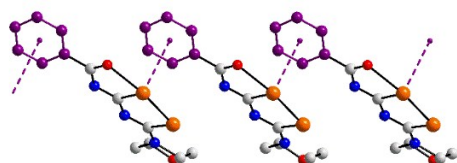

Notes: **1-D**. Binuclear molecules self-associate *via* one selenium(II) atom to form a chain with a linear topology.

A. Linden, Y. Zhou and H. Heimgartner, *Acta Crystallogr., Sect. C: Cryst. Struct. Chem.*, 2014, **70**, 482.



**118 LIFFUD** 3.95 Å 18.8°

2,4-bis((4-Chlorophenyl)selanyl)-3-phenylquinoline

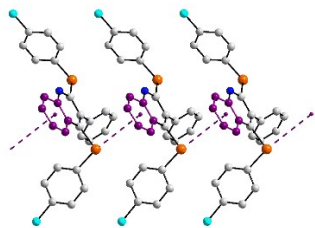

Notes: **1-D**. Binuclear molecules associate via one Se(II) atom only to form a linear chain.

T. Mitamura, K. Iwata, A. Nomoto and A. Ogawa, *Org. Biomol. Chem.*, 2011, **9**, 3768.

**119 ICEWIY** 3.52 Å 11.6°

1,1'-(Diselane-1,2-diylbis(2,1-phenylenecarbonyloxy))dipyrrolidone-2,5-dione

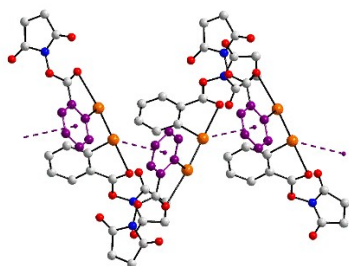

Notes: **1-D**. Binuclear molecules self-associate *via* one Se(II) atom only to form a chain with a zigzag topology.

K. Selvakumar, P. Shah, H. B. Singh and R. J. Butcher, *Chem.-Eur. J.*, 2011, **17**, 12741.

**120 REDGUE** 3.94 Å 16.8°

2,2'-(Diselane-1,2-diylbis(2,1-phenylenemethylidene nitrilo))diphenol

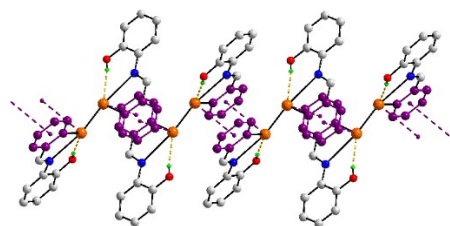

Notes: **1-D**. Binuclear molecules with two-fold symmetry. These associate into a twisted chain *via* two Se(II) involving one Se(II) centre only.

S. Panda, P. Kr. Dutta, G. Ramakrishna, C. M. Ready and S. S. Zade, *J. Organomet. Chem.*, 2012, **717**, 45.

**121 WARKOR** 3.54 Å 15.2°; 3.79 Å 6.7°

5,6-Bis(phenylselanyl)-1,2-dihydroacenaphthylene

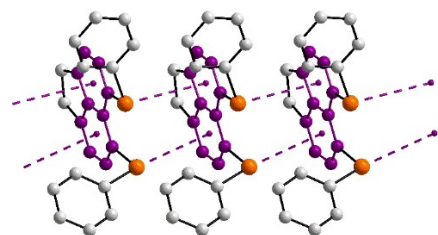

Notes: **1-D**. Binuclear molecule. These associate *via* two Se(II) interactions to form a linear chain.

L. K. Aschenbach, F. R. Knight, R. A. M. Randall, D. B. Cordes, A. Baggott, M. Buhl, A. M. Z. Slawin and J. D. Woollins, *Dalton Trans.*, 2012, **41**, 3141.



122 IGIXIH 3.69 Å 17.0°

Bis(1-naphthyl) diselenide

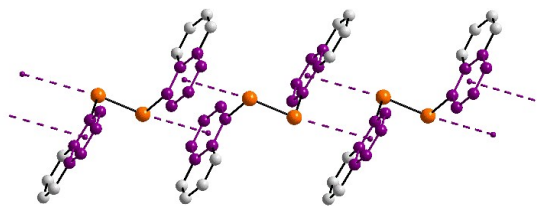

Notes: **1-D**. Binuclear molecules, with two-fold symmetry, self-associate *via* both Se(II) atoms to form a chain with a linear topology. E. M. Takaluoma, T. T. Takaluoma, R. Oilunkaniemi and R. S. Laitinen, *Z. Anorg. Allg. Chem.*, 2015, **641**, 772.

123 SUWFIB 3.68 Å 2.8°

8,17,26,35-Tetra-*t*-butyl-37,38,39,40-tetramethoxy-3,4,12,13,21,22,30,31-octaselenapentacyclo[31.3.1.16,10.115,19.124,28]tetraconta-1(37),6(40),7,9,15(39),16,18,24(38),25,27,33,35-dodecaene

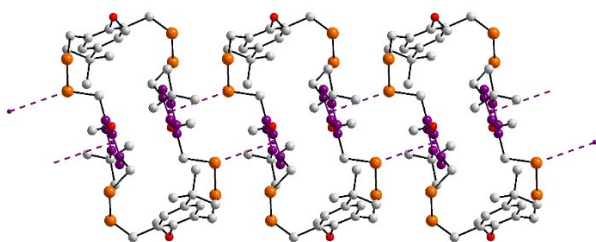

Notes: **1-D**. Octanuclear molecule located about a centre of inversion. Two of the Se(II) atoms per molecule form interactions to generate a linear chain. J. Thomas, L. Dobrzańska, L. Van Meervelt, M. A. Quevedo, K. Woźniak, M. Stachowicz, M. Smet, W. Maes and W. Dehaen, *Chem.-Eur. J.*, 2015, **22**, 979.

**ESI Table S(8). Images for a selenium(IV)··· $\pi$ (arene) structure.**

**124 PAHFOV 3.56 Å 2.4°**

1,1-Dichloro-1,5-diphenyl-1,5-diselena-2,4-diaza-3-thiapenta-2,3-diene

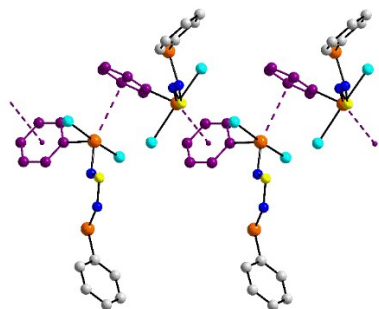

Notes: **1-D**. Binuclear molecules, containing both Se(II) and Se(IV). These associate *via* Se(IV) to form a zigzag chain.

A. G. Makarov, T. D. Grayfer, A. Yu.

Makarov, I. Yu. Bagryanskaya, V. G. Vasiliev and A. V. Zibarev, *Mendeleev Commun.*,

2011, **21**, 320.

**ESI Table S(9). Images for all tellurium(II)··· $\pi$ (arene) structures.**

**125** POYGIT01 3.61 Å 8.8°

Iodo-(phenyldiazenylphenyl)-tellurium(II)

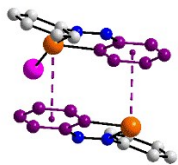

NOTES: **0-D**. Mononuclear molecule which associates about a centre of inversion *via* Te(II) interactions to form a dimeric aggregate.

K. Srivastava, P. Shah, H. B. Singh and R. J. Butcher, *Organometallics*, 2011, **30**, 534.

**126** HUIROV 3.67 Å 14.3°

(*Z*)-(2,4,6-Trimethylphenyl)(2-phenylvinyl)telluride

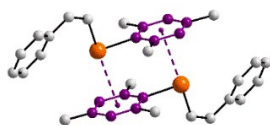

NOTES: **0-D**. Mononuclear molecule which associates about a centre of inversion *via*

Te(II) interactions to form a dimeric aggregate.

B. Singh, A. K. S. Chauhan, R. C. Srivastava, A. Duthie and R. J. Butcher, *RSC Advances*, 2015, **5**, 58246.

**127** VUBPIT 3.69 Å 8.9°; 3.72 Å 12.1°

3,4,5-Tris(pentafluorophenyl)-2,6-diphenyl-4H-1,4-telluraborinine

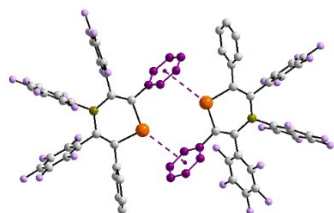

NOTES: **0-D**. Two independent mononuclear molecules associate *via* a pair Te(II) interactions to form a dimeric aggregate.

F. A. Tsao, A. J. Lough and D. W. Stephan, *Chem. Commun.*, 2015, **51**, 4287.

**128** TOWZOW 3.54 Å 5.7°

1,2-Dimesityl-1,2-dihydro-1,2-naphtho[1,8-cd][1,2]ditellurole

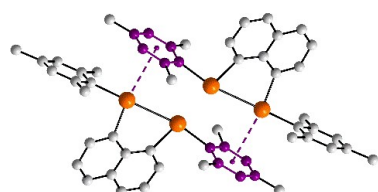

NOTES: **0-D**. Binuclear molecule associates about a centre of inversion *via* a pair Te(II) interactions involving one Te centre only to form a dimeric aggregate.

F. R. Knight, L. M. Diamond, K. S. A. Arachchige, P. S. Camacho, R. A. M. Randall, S. E. Ashbrook, M. Buhl, A. M. Z. Slawin and J. D. Woollins, *Chem.-Eur. J.*, 2015, **21**, 3613.

**129 TOWYEL** 3.58 Å 9.8°

1,2-Bis(4-methylphenyl)-1,2,5,6-tetrahydro-1,2-acenaphtho[5,6-cd][1,2]ditellurole

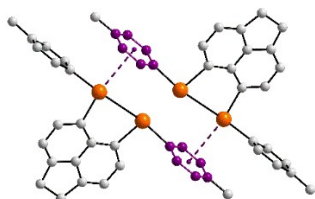

NOTES: **0-D**. Binuclear molecule associates about a centre of inversion *via* a pair Te(II) interactions involving one Te centre only to form a dimeric aggregate.

F. R. Knight, L. M. Diamond, K. S. A. Arachchige, P. S. Camacho, R. A. M. Randall, S. E. Ashbrook, M. Buhl, A. M. Z. Slawin and J. D. Woollins, *Chem.-Eur. J.*, 2015, **21**, 3613.

**130 TOXCAM** 3.62 Å 14.1°

1,2-Dimesityl-1,2-dihydro-1,2-acenaphtho[5,6-cd][1,2]ditellurole

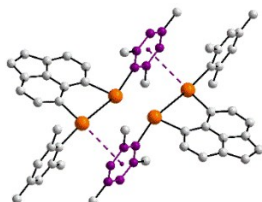

NOTES: **0-D**. Binuclear molecule associates about a centre of inversion *via* a pair Te(II) interactions involving one Te centre only to form a dimeric aggregate.

F. R. Knight, L. M. Diamond, K. S. A. Arachchige, P. S. Camacho, R. A. M. Randall, S. E. Ashbrook, M. Buhl, A. M. Z. Slawin and J. D. Woollins, *Chem.-Eur. J.*, 2015, **21**, 3613.

**131 KIBTEW** 3.63 Å 14.4°

1,2-Dimesityl-1,2,5,6-tetrahydro-1 $\lambda^4$ ,2 $\lambda^4$ -acenaphtho[5,6-cd][1,2]ditellurole

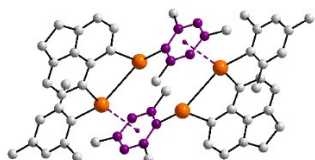

Notes: **0-D**. Binuclear molecule.  
Centrosymmetrically related molecules

associate *via* two Te(II) interactions involving only one of the Te centres.

M. Buehl, F. R. Knight, A. Kristkova, I. M. Ondik, O. L. Malkina, R. A. M. Randall, A. M. Z. Slawin and J. D. Woollins, *Angew. Chem., Int. Ed.*, 2013, **52**, 2495.

**132 TOXBIT** 3.65 Å 9.3°

1,2-Bis(4-methylphenyl)-1,2-dihydro-1,2-acenaphtho[5,6-cd][1,2]ditellurole

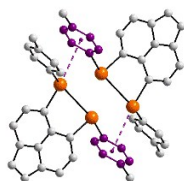

NOTES: **0-D**. Binuclear molecule associates about a centre of inversion *via* a pair Te(II) interactions involving one Te centre only to form a dimeric aggregate.

F. R. Knight, L. M. Diamond, K. S. A. Arachchige, P. S. Camacho, R. A. M. Randall, S. E. Ashbrook, M. Buhl, A. M. Z. Slawin and J. D. Woollins, *Chem.-Eur. J.*, 2015, **21**, 3613.

**133 TOXBOZ** 3.68 Å 12.7°

1,2-Bis(4-methoxyphenyl)-1,2-dihydro-1,2-acenaphtho[5,6-cd][1,2]ditellurole

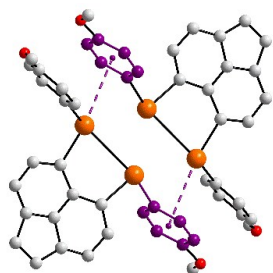

NOTES: **0-D**. Binuclear molecule associates about a centre of inversion *via* a pair Te(II) interactions involving one Te centre only to form a dimeric aggregate.

F. R. Knight, L. M. Diamond, K. S. A. Arachchige, P. S. Camacho, R. A. M. Randall, S. E. Ashbrook, M. Buhl, A. M. Z. Slawin and J. D. Woollins, *Chem.-Eur. J.*, 2015, **21**, 3613.

**134 TOXCIU** 3.69 Å 10.4°

1,2-Bis(4-fluorophenyl)-1,2-dihydro-1,2-naphtho[1,8-cd][1,2]ditellurole

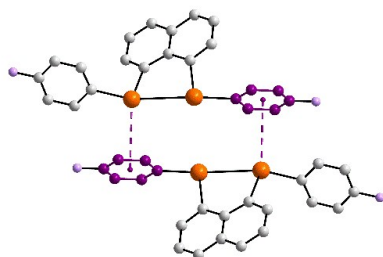

NOTES: **0-D**. Binuclear molecule associates about a centre of inversion *via* a pair Te(II) interactions involving one Te centre only to form a dimeric aggregate.

F. R. Knight, L. M. Diamond, K. S. A. Arachchige, P. S. Camacho, R. A. M. Randall, S. E. Ashbrook, M. Buhl, A. M. Z. Slawin and J. D. Woollins, *Chem.-Eur. J.*, 2015, **21**, 3613.

**135 TOXCOA** 3.71 Å 9.9°

1,2-Bis(4-methylphenyl)-1,2-dihydro-1,2-naphtho[1,8-cd][1,2]ditellurole

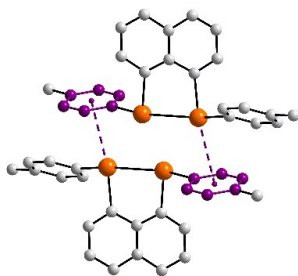

NOTES: **0-D**. Binuclear molecule associates about a centre of inversion *via* a pair Te(II) interactions involving one Te centre only to form a dimeric aggregate.

F. R. Knight, L. M. Diamond, K. S. A. Arachchige, P. S. Camacho, R. A. M. Randall, S. E. Ashbrook, M. Buhl, A. M. Z. Slawin and J. D. Woollins, *Chem.-Eur. J.*, 2015, **21**, 3613.

**136 TOWYIP** 3.72 Å 9.9°

1,2-Bis(4-methoxyphenyl)-1,2,5,6-tetrahydro-1,2-acenaphtho[5,6-cd][1,2]ditellurole

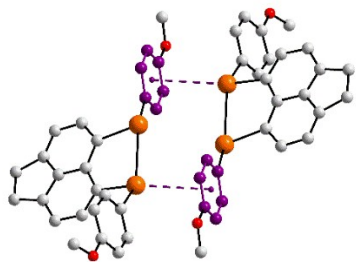

NOTES: **0-D**. Binuclear molecule associates about a centre of inversion *via* a pair Te(II) interactions involving one Te centre only to form a dimeric aggregate.

F. R. Knight, L. M. Diamond, K. S. A. Arachchige, P. S. Camacho, R. A. M. Randall, S. E. Ashbrook, M. Buhl, A. M. Z. Slawin and J. D. Woollins, *Chem.-Eur. J.*, 2015, **21**, 3613.

**137 TOWZAI** 3.78 Å 16.6°

1,2-Bis(4-methoxyphenyl)-1,2-dihydro-1,2-naphtho[1,8-cd][1,2]ditellurole

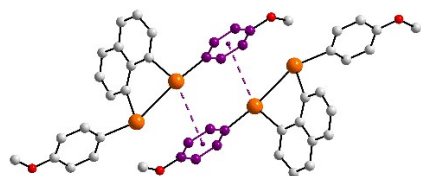

interactions involving one Te centre only to form a dimeric aggregate.

F. R. Knight, L. M. Diamond, K. S. A. Arachchige, P. S. Camacho, R. A. M. Randall, S. E. Ashbrook, M. Buhl, A. M. Z. Slawin and J. D. Woollins, *Chem.-Eur. J.*, 2015, **21**, 3613.

NOTES: **0-D**. Binuclear molecule associates about a centre of inversion *via* a pair Te(II)

**138 BETDAG01** 3.85 Å 18.6°

1-Iodo-1,2,2-trimesityl-1 $\lambda^4$ ,2 $\lambda^4$ -ditellane

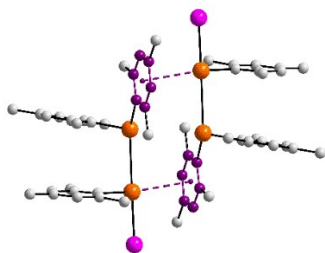

Notes: **0-D**. Binuclear molecule.

Centrosymmetrically related molecules associate *via* two Te(II) interactions involving only one of the Te centres.

E. Faoro, G. M. de Oliveira, E. S. Lang and C. B. Pereira, *J. Organomet. Chem.*, 2011, **696**, 2438.

**139 NECVOI** 3.48 Å 12.7°

4-(1-Naphthyltellanyl)benzonitrile

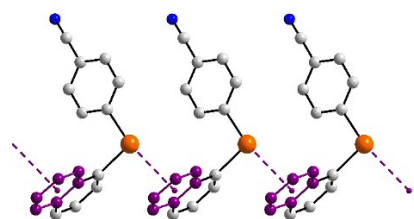

NOTES: **1-D**. Mononuclear molecule which associates into a linear chain *via* Te(II) interactions.

T. Nakai, N. Nishino, S. Hayashi, M. Hashimoto and W. Nakanishi, *Dalton Trans.*, 2012, **41**, 7485.

**140 HUHMII** 3.67 Å 10.0°; 3.58 Å, 1.5°

Ethyl 3-(mesityltellanyl)acrylate

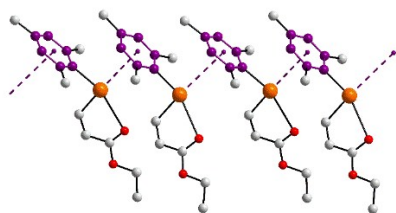

NOTES: **1-D**. Two independent mononuclear molecules which associate into a linear chain *via* Te(II) interactions.

B. Singh, A. K. S. Chauhan, R. C. Srivastava, A. Duthie and R. J. Butcher, *RSC Advances*, 2015, **5**, 58246.

141 WARLEI 3.74 Å 5.3°

5-(Phenylsulfanyl)-6-(phenyltellanyl)-1,2-dihydroacnaphthylene

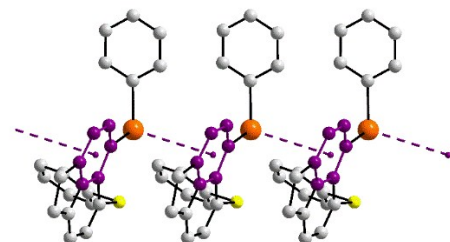

NOTES: **1-D**. Mononuclear molecule which associates into a linear chain *via* Te(II) interactions.

L. K. Aschenbach, F. R. Knight, R. A. M. Randall, D. B. Cordes, A. Baggott, M. Buhl, A. M. Z. Slawin and J. D. Woollins, *Dalton Trans.*, 2012, **41**, 3141.

142 WARJOQ 3.85 Å 3.7°

6-Bromo-1,2-dihydroacnaphthylen-5-yl phenyl telluride

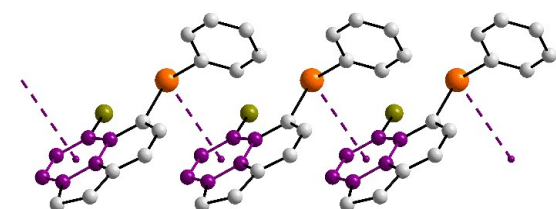

NOTES: **1-D**. Mononuclear molecule which associates into a linear chain *via* Te(II) interactions.

L. K. Aschenbach, F. R. Knight, R. A. M. Randall, D. B. Cordes, A. Baggott, M. Buhl, A. M. Z. Slawin and J. D. Woollins, *Dalton Trans.*, 2012, **41**, 3141.

143 WARKEH 3.92 Å 4.2°; 3.92 Å 4.8°

6-Iodo-1,2-dihydroacnaphthylen-5-yl phenyl telluride

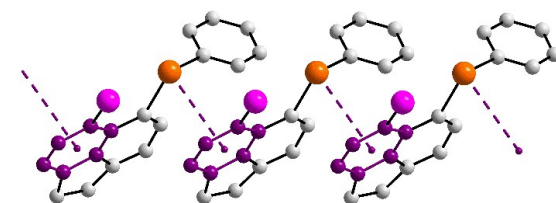

NOTES: **1-D**. Two independent mononuclear molecules. Each self-associates into a linear chain *via* Te(II) interactions.

L. K. Aschenbach, F. R. Knight, R. A. M. Randall, D. B. Cordes, A. Baggott, M. Buhl, A. M. Z. Slawin and J. D. Woollins, *Dalton Trans.*, 2012, **41**, 3141.

144 HUIJRAH 3.93 Å 8.1°



Ethyl 3-(1-naphthyltellanyl)acrylate

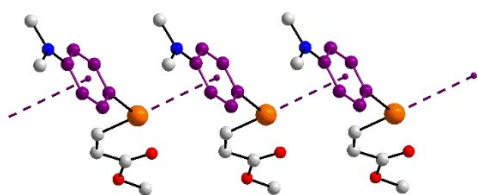

NOTES: **1-D**. Mononuclear molecule which associates into a linear chain *via* Te(II) interactions.

B. Singh, A. K. S. Chauhan, R. C. Srivastava, A. Duthie and R. J. Butcher, *RSC Advances*, 2015, **5**, 58246.

**145** UJOSES 3.62 Å 7.5°  
(2-Mesityl-2-oxoethyl)-(1-naphthyl)-tellurium(II)

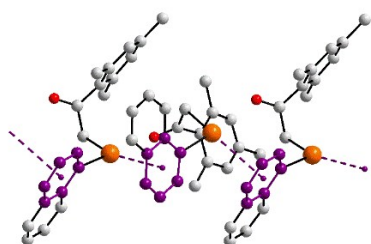

NOTES: **1-D**. Mononuclear molecule which associates into a zigzag chain *via* Te(II) interactions.

A. K. S. Chauhan, P. Singh, R. C. Srivastava, R. J. Butcher and A. Duthie, *J. Organomet. Chem.*, 2010, **695**, 2118.

**146** GUFPA 3.79 Å 11.6°  
16,19-Diphenyl-15-tellurapentacyclo[6.6.5.0<sup>1,18</sup>.0<sup>2,7</sup>.0<sup>9,14</sup>]nonadeca-2,4,6,9,11,13,16,18-octaene

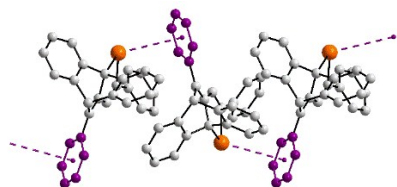

Notes: **1-D**. Mononuclear molecule as a benzene solvate. Self-associate to form a chain with a zigzag topology.

T. Annaka, N. Nakata and A. Ishii, *Organometallics*, 2015, **34**, 1272.

**147** EHUSOQ 3.62 Å 0.8°  
Phenyl-(2-(diphenylphosphine oxide)-(4-trifluorophenyl)vinyl)-tellurium(II)

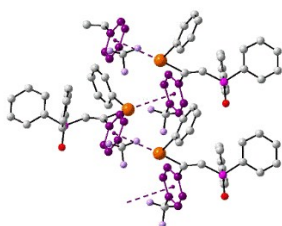

Notes: **1-D**. Mononuclear molecules self-associate to form a chain with a helical topology.

S. Kawaguchi, T. Ohe, T. Shirai, A. Nomoto, M. Sonoda and A. Ogawa, *Organometallics*, 2010, **29**, 312.

**148** GUDGET 3.71 Å 11.1°

3',3'-Bis(1-naphthyl)spiro[telluroxanthene-9,2'-thiirane] benzene solvate

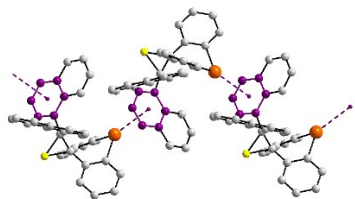

Notes: **1-D**. Mononuclear molecule as a benzene solvate. Self-associate to form a chain with a helical topology; the solvent does not form an interaction.

N. Assadi, S. Cohen, S. Pogodin and I. Agranat, *Struct. Chem.*, 2015, **26**, 319.

**149** YUXQEO 3.55 Å 9.3°

(P)-Diphenyl ditelluride

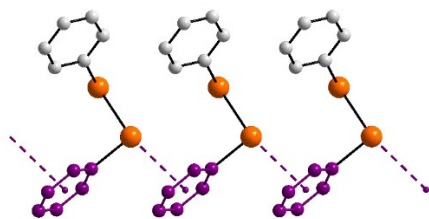

Notes: **1-D**. Binuclear molecule. One Te centre forms interactions to generate a linear chain.

A. L. Fuller, L. A. S. Scott-Hayward, Y. Li, M. Buhl, A. M. Z. Slawin and J. D. Woollins, *J. Am. Chem. Soc.*, 2010, **132**, 5799.

**150** MUWFIU 3.72 Å 8.5°

trans-1-(2-Benzotellurophen-1(3H)-ylidene)-1,3-dihydro-2-benzotellurophene

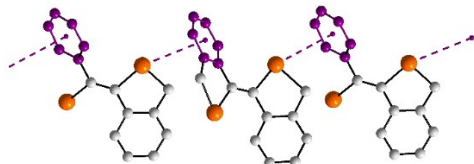

NOTES: **1-D**. Mononuclear molecule which associates into a zigzag chain *via* Te(II) interactions.

H. Sashida, M. Kaname, A. Nakayama, H. Suzuki and M. Minoura, *Tetrahedron*, 2010, **66**, 5149.

**151** INIXAF 3.62 Å 9.3°

Bis( $\mu_2$ -4,4'-bis(methylamido)-1,1'-binaphthalene-5,5'-diyl)-tetrakis( $\mu_2$ -oxo)-tetra-tellurium tetrahydrofuran solvate

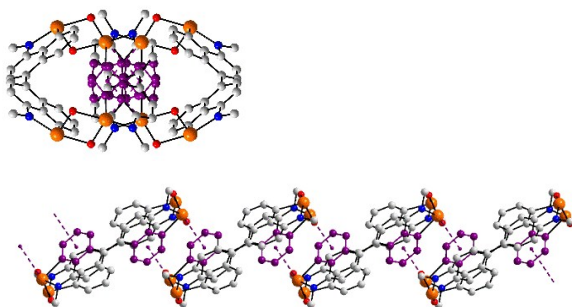

NOTES: **1-D**. Tetranuclear molecule with two independent Te(II) centres and with two-fold symmetry. One Te(II) atom, two per molecule, forms Te(II) interactions to form a linear chain.

J. Beckmann and J. Bolsinger, *Z. Anorg. Allg. Chem.*, 2011, **637**, 29.

**ESI Table S(10). Images for all tellurium(IV)··· $\pi$ (arene) structures.**

**152**    **RATFID** 3.51 Å 11.7°

( $\mu_2$ -Oxo)-( $\mu_2$ -propane-1,3-diyl)-di-iodo-diphenyl-di-tellurium

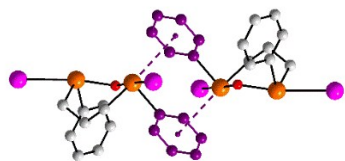

NOTES: **0-D**. Binuclear molecule associates about a centre of inversion *via* Te(IV) interactions to form a dimeric aggregate.

R. Cargnelutti, E. S. Lang, G. M. de Oliveira and P. C. Piquini, *Polyhedron*, 2012, **39**, 106.

**153**    **IRUKEM** 3.58 Å 9.9°

4,4',7,7'-Tetraisopropyl-2,2'-spirobi[[1,3,2]benzodithiatellurole]

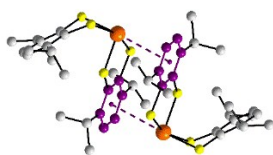

Notes: **0-D**. Mononuclear molecule.

Centrosymmetrically related molecules associate *via* two Te(IV) interactions.

S. Ogawa, S. Ohwada, M. Yoshida and H. Muraoka, *Heteroat. Chem.*, 2011, **22**, 586.

**154**    **UJOSIW** 3.64 Å 8.1°

(2-Mesityl-2-oxoethyl)-(1-naphthyl)-dichloro-tellurium(IV)

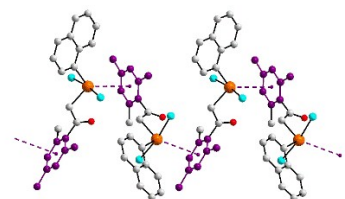

NOTES: **1-D**. Mononuclear molecule which associates into a zigzag chain *via* Te(IV) interactions.

A. K. S. Chauhan, P. Singh, R. C. Srivastava, R. J. Butcher and A. Duthie, *J. Organomet. Chem.*, 2010, **695**, 2118.

**155**    **KAKCOP** 3.76 Å 19.4°

Dichloro-(4-dimethylaminophenyl)-phenyl-tellurium(IV)

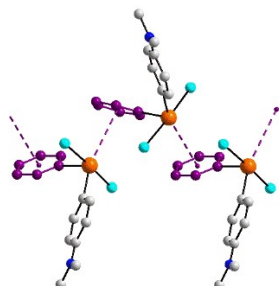

Notes: **1-D**. Mononuclear molecules self-associate to form a chain with a zigzag topology.

J. Beckmann, D. Dakternieks, A. Duthie, C. Mitchell and M. Schurmann, *Aust. J. Chem.*, 2005, **58**, 119.

**156**    **WARNEK** 3.83 Å 18.0°

(6-Bromo-1,2-dihydroacenaphthylen-5-yl)-  
tribromo-tellurium

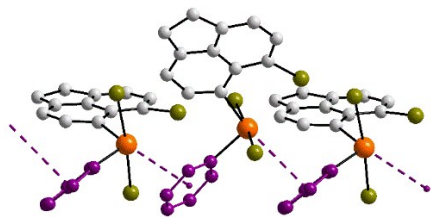

NOTES: **1-D**. Mononuclear molecule which associates into a zigzag chain *via* Te(IV) interactions.

L. K. Aschenbach, F. R. Knight, R. A. M. Randall, D. B. Cordes, A. Baggott, M. Buhl, A. M. Z. Slawin and J. D. Woollins, *Dalton Trans.*, 2012, **41**, 3141.

157 **HAQHOY** 3.85 Å 9.6°

2-(Dichloro(2-chloro-2-phenylvinyl)- $\lambda^4$ -  
tellanyl)-1,3,5-trimethylbenzene

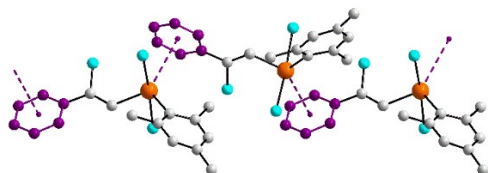

Notes: **1-D**. Mononuclear molecule as a benzene solvate. Self-associate to form a chain with a zigzag topology.

A.K. S. Chauhan, S. N. Bharti, R. C. Srivastava, R. J. Butcher and A. Duthie, *J. Organomet. Chem.*, 2012, **708**, 75.
